# Supplementary material for: Detection and annotation of plant organs from digitised herbarium scans using deep learning
Source: Biodivers Data J. 2020 Dec 10;8:e57090. doi: 10.3897/BDJ.8.e57090 (PMC7746675; doi:10.3897/BDJ.8.e57090)
Supplement: Supplementary material 2 — Specimen List [file bdj-08-e57090-s002.csv]

gbifID	catalogNumber	leaf	flower	fruit	seed	stem	root	dataset	family	genus	species	url
620620402	FR-0001310	2	12	0	0	3	0	FR	Orchidaceae	Orchis	Orchis mascula	http://sesam.senckenberg.de/pictures/originale/32/63614.jpg
620620401	FR-0001311	5	0	0	0	0	0	FR	Orchidaceae	Orchis	Orchis mascula	http://sesam.senckenberg.de/pictures/originale/32/63615.jpg
620620400	FR-0001312	4	18	0	0	2	0	FR	Orchidaceae	Orchis	Orchis mascula	http://sesam.senckenberg.de/pictures/originale/32/63616.jpg
620620412	FR-0001314	1	9	0	0	1	1	FR	Orchidaceae	Orchis	Orchis mascula	http://sesam.senckenberg.de/pictures/originale/32/63617.jpg
620620405	FR-0001315	3	13	0	0	2	0	FR	Orchidaceae	Orchis	Orchis mascula	http://sesam.senckenberg.de/pictures/originale/32/63618.jpg
620620404	FR-0001316	4	1	0	0	1	2	FR	Orchidaceae	Orchis	Orchis mascula	http://sesam.senckenberg.de/pictures/originale/32/63619.jpg
620620406	FR-0001317	4	19	0	0	4	2	FR	Orchidaceae	Orchis	Orchis mascula	http://sesam.senckenberg.de/pictures/originale/32/63620.jpg
620620407	FR-0001318	3	5	0	0	2	0	FR	Orchidaceae	Orchis	Orchis mascula	http://sesam.senckenberg.de/pictures/originale/32/63621.jpg
620620403	FR-0001319	2	15	0	0	4	0	FR	Orchidaceae	Orchis	Orchis mascula	http://sesam.senckenberg.de/pictures/originale/32/63622.jpg
620620409	FR-0001320	5	26	0	0	5	0	FR	Orchidaceae	Orchis	Orchis mascula	http://sesam.senckenberg.de/pictures/originale/32/63623.jpg
620620411	FR-0001323	2	9	0	0	3	1	FR	Orchidaceae	Orchis	Orchis mascula	http://sesam.senckenberg.de/pictures/originale/32/63624.jpg
620620408	FR-0002105	4	14	0	0	4	0	FR	Orchidaceae	Orchis	Orchis mascula	http://sesam.senckenberg.de/pictures/originale/32/63625.jpg
912723457	FR-0004455	17	18	2	0	3	0	FR	Malvaceae	Palaua	Palaua guentheri	http://sesam.senckenberg.de/pictures/originale/32/63626.jpg
699146874	FR-0004456	0	0	0	0	2	11	FR	Malvaceae	Palaua	Palaua guentheri	http://sesam.senckenberg.de/pictures/originale/32/63627.jpg
912723462	FR-0004513	15	13	0	1	5	0	FR	Malvaceae	Palaua	Palaua weberbaueri
912723459	FR-0004514	25	34	0	0	5	1	FR	Malvaceae	Palaua	Palaua weberbaueri	http://sesam.senckenberg.de/pictures/originale/32/63629.jpg
699146879	FR-0004540	39	6	0	0	5	2	FR	Malvaceae	Palaua	Palaua malvifolia	http://sesam.senckenberg.de/pictures/originale/32/63630.jpg
912723458	FR-0004608	10	11	0	0	5	0	FR	Malvaceae	Palaua	Palaua velutina	http://sesam.senckenberg.de/pictures/originale/32/63631.jpg
912723461	FR-0004619	31	28	4	1	9	0	FR	Malvaceae	Palaua	Palaua dissecta	http://sesam.senckenberg.de/pictures/originale/32/63633.jpg
699146806	FR-0004657	46	18	2	0	11	3	FR	Malvaceae	Palaua	Palaua dissecta	http://sesam.senckenberg.de/pictures/originale/32/63636.jpg
317857657	FR-0007130	42	40	0	0	6	0	FR	Asteraceae	Baccharis	Baccharis microdonta	http://sesam.senckenberg.de/pictures/originale/32/63638.jpg
317857626	FR-0007150	19	26	0	0	2	0	FR	Asteraceae	Baccharis	Baccharis grisebachii	http://sesam.senckenberg.de/pictures/originale/32/63639.jpg
317867945	FR-0007263	7	24	0	0	5	0	FR	Lauraceae	Machilus	Machilus macranthus	http://sesam.senckenberg.de/pictures/originale/32/63640.jpg
362409994	FR-0030790	7	13	0	0	0	0	FR	Cyperaceae	Carex	Carex paniculata	http://sesam.senckenberg.de/pictures/originale/32/63642.jpg
362409996	FR-0030791	4	3	0	0	2	0	FR	Cyperaceae	Carex	Carex paniculata	http://sesam.senckenberg.de/pictures/originale/32/63643.jpg
362426669	FR-0030792	5	8	0	0	1	0	FR	Lauraceae	Ocotea	Ocotea cernua	http://sesam.senckenberg.de/pictures/originale/32/63645.jpg
317859024	FR-0030793	19	21	0	0	15	0	FR	Asteraceae	Carduus	Carduus pycnocephalus	http://sesam.senckenberg.de/pictures/originale/32/63646.jpg
317865536	FR-0030795	8	7	8	20	11	0	FR	Asteraceae	Hieracium	Hieracium tephrosoma	http://sesam.senckenberg.de/pictures/originale/32/63647.jpg
317865537	FR-0030796	13	2	2	7	8	1	FR	Asteraceae	Hieracium	Hieracium tephrosoma	http://sesam.senckenberg.de/pictures/originale/32/63648.jpg
317865608	FR-0030798	5	9	0	0	11	2	FR	Asteraceae	Hieracium	Hieracium sylvaticum	http://sesam.senckenberg.de/pictures/originale/32/63649.jpg
317865515	FR-0030799	29	21	1	0	14	4	FR	Asteraceae	Hieracium	Hieracium halacsyi	http://sesam.senckenberg.de/pictures/originale/32/63650.jpg
684290266	FR-0030800	6	6	1	0	5	1	FR	Asteraceae	Hieracium	Hieracium juranum	http://sesam.senckenberg.de/pictures/originale/32/63651.jpg
317857221	FR-0030802	19	40	0	0	7	0	FR	Asteraceae	Artemisia	Artemisia persica	http://sesam.senckenberg.de/pictures/originale/32/63652.jpg
317859699	FR-0030803	16	2	9	0	16	0	FR	Asteraceae	Centaurea	Centaurea laconica	http://sesam.senckenberg.de/pictures/originale/32/63653.jpg
317859718	FR-0030804	27	11	0	0	7	1	FR	Asteraceae	Centaurea	Centaurea paphlagonica	http://sesam.senckenberg.de/pictures/originale/32/63655.jpg
362403638	FR-0030805	16	2	0	0	5	0	FR	Ranunculaceae	Adonis	Adonis dentata	http://sesam.senckenberg.de/pictures/originale/32/63657.jpg
317867914	FR-0030806	15	7	0	0	3	1	FR	Asteraceae	Anthemis	Anthemis persica	http://sesam.senckenberg.de/pictures/originale/32/63658.jpg
812026824	FR-0030808	7	0	0	0	1	0	FR	Theaceae	Gordonia	Gordonia portoricensis	http://sesam.senckenberg.de/pictures/originale/32/63660.jpg
317867607	FR-0030809	16	5	0	0	3	0	FR	Boraginaceae	Glandora	Glandora oleifolia	http://sesam.senckenberg.de/pictures/originale/32/63662.jpg
317872223	FR-0030810	22	9	0	0	8	0	FR	Rosaceae	Rubus	Rubus pottianus	http://sesam.senckenberg.de/pictures/originale/32/63663.jpg
362415736	FR-0030811	1	6	0	0	4	0	FR	Primulaceae	Dionysia	Dionysia revoluta	http://sesam.senckenberg.de/pictures/originale/32/63664.jpg
362415738	FR-0030812	4	4	0	0	7	0	FR	Primulaceae	Dionysia	Dionysia diapensiifolia	http://sesam.senckenberg.de/pictures/originale/32/63665.jpg
317864950	FR-0030813	10	1	0	0	2	0	FR	Theaceae	Polyspora	Polyspora ceylanica	http://sesam.senckenberg.de/pictures/originale/32/63666.jpg
362418217	FR-0030814	14	1	1	0	2	0	FR	Pentaphylacaceae	Eurya	Eurya nitida	http://sesam.senckenberg.de/pictures/originale/32/63667.jpg
362418215	FR-0030815	33	17	0	0	3	0	FR	Pentaphylacaceae	Eurya	Eurya chinensis	http://sesam.senckenberg.de/pictures/originale/32/63668.jpg
317863996	FR-0030816	16	1	0	0	4	0	FR	Pentaphylacaceae	Eurya	Eurya ceylanica	http://sesam.senckenberg.de/pictures/originale/32/63669.jpg
317874527	FR-0030817	11	12	3	0	3	0	FR	Pentaphylacaceae	Ternstroemia	Ternstroemia luquillensis	http://sesam.senckenberg.de/pictures/originale/32/63670.jpg
317875887	FR-0030818	12	0	11	0	3	0	FR	Cunoniaceae	Weinmannia	Weinmannia lucida	http://sesam.senckenberg.de/pictures/originale/32/63671.jpg
317871205	FR-0030819	17	5	0	0	3	0	FR	Rubiaceae	Psychotria	Psychotria bisulcata	http://sesam.senckenberg.de/pictures/originale/32/63672.jpg
317875191	FR-0030820	28	39	0	6	2	1	FR	Urticaceae	Urtica	Urtica membranacea	http://sesam.senckenberg.de/pictures/originale/32/63866.jpg
317867248	FR-0030821	4	1	4	0	7	0	FR	Lecythidaceae	Couratari	Couratari multiflora	http://sesam.senckenberg.de/pictures/originale/32/63867.jpg
317868785	FR-0030824	10	8	0	0	4	0	FR	Rubiaceae	Mussaenda	Mussaenda chlorantha	http://sesam.senckenberg.de/pictures/originale/32/63868.jpg
317865242	FR-0030825	21	12	0	0	11	0	FR	Asteraceae	Helichrysum	Helichrysum armenium	http://sesam.senckenberg.de/pictures/originale/32/63869.jpg
317871763	FR-0030826	85	1	15	0	8	0	FR	Rhamnaceae	Rhamnus	Rhamnus alaternus	http://sesam.senckenberg.de/pictures/originale/32/63870.jpg
331864758	FR-0030827	86	12	1	0	9	0	FR	Fabaceae	Colutea	Colutea persica	http://sesam.senckenberg.de/pictures/originale/32/63871.jpg
362403149	FR-0030828	6	5	1	0	2	0	FR	Fabaceae	Archidendropsis	Archidendropsis granulosa	http://sesam.senckenberg.de/pictures/originale/32/63872.jpg
317857438	FR-0030829	18	5	0	0	5	0	FR	Fabaceae	Astragalus	Astragalus turolensis	http://sesam.senckenberg.de/pictures/originale/32/63873.jpg
317863873	FR-0030830	19	9	4	9	1	2	FR	Euphorbiaceae	Euphorbia	Euphorbia salicifolia	http://sesam.senckenberg.de/pictures/originale/32/63874.jpg
317863874	FR-0030831	51	6	9	1	9	0	FR	Euphorbiaceae	Euphorbia	Euphorbia kerneri	http://sesam.senckenberg.de/pictures/originale/32/63875.jpg
317863937	FR-0030832	16	0	3	1	4	8	FR	Euphorbiaceae	Euphorbia	Euphorbia arvalis	http://sesam.senckenberg.de/pictures/originale/32/63876.jpg
317865616	FR-0030833	21	7	0	0	11	2	FR	Asteraceae	Hieracium	Hieracium chondrillifolium	http://sesam.senckenberg.de/pictures/originale/32/63877.jpg
317865615	FR-0030834	19	2	5	0	11	3	FR	Asteraceae	Hieracium	Hieracium chondrillifolium	http://sesam.senckenberg.de/pictures/originale/32/63879.jpg
317865538	FR-0030835	4	1	2	0	3	2	FR	Asteraceae	Hieracium	Hieracium oxydon	http://sesam.senckenberg.de/pictures/originale/32/63880.jpg
317865614	FR-0030836	18	1	1	0	6	2	FR	Asteraceae	Hieracium	Hieracium chondrillifolium	http://sesam.senckenberg.de/pictures/originale/32/63881.jpg
317865613	FR-0030837	9	2	0	0	3	2	FR	Asteraceae	Hieracium	Hieracium chondrillifolium	http://sesam.senckenberg.de/pictures/originale/32/63882.jpg
736319262	FR-0030838	18	5	0	0	14	1	FR	Asteraceae	Hieracium	Hieracium chondrillifolium	http://sesam.senckenberg.de/pictures/originale/32/63883.jpg
317865611	FR-0030839	7	4	8	0	12	0	FR	Asteraceae	Hieracium	Hieracium chondrillifolium	http://sesam.senckenberg.de/pictures/originale/32/63884.jpg
317865610	FR-0030840	11	2	3	0	7	1	FR	Asteraceae	Hieracium	Hieracium chondrillifolium	http://sesam.senckenberg.de/pictures/originale/32/63886.jpg
317865609	FR-0030841	14	2	0	0	8	2	FR	Asteraceae	Hieracium	Hieracium chondrillifolium	http://sesam.senckenberg.de/pictures/originale/32/63887.jpg
317868742	FR-0030842	28	0	12	0	8	0	FR	Myrtaceae	Mosiera	Mosiera occidentalis	http://sesam.senckenberg.de/pictures/originale/32/63888.jpg
317860585	FR-0030843	7	4	1	0	2	0	FR	Fabaceae	Clitoria	Clitoria arborescens	http://sesam.senckenberg.de/pictures/originale/32/63889.jpg
317857222	FR-0030844	76	13	0	0	14	0	FR	Asteraceae	Artemisia	Artemisia haussknechtii	http://sesam.senckenberg.de/pictures/originale/32/63890.jpg
317857223	FR-0030845	34	17	0	0	5	0	FR	Asteraceae	Artemisia	Artemisia haussknechtii	http://sesam.senckenberg.de/pictures/originale/32/63891.jpg
317857224	FR-0030846	60	15	0	0	7	0	FR	Asteraceae	Artemisia	Artemisia haussknechtii	http://sesam.senckenberg.de/pictures/originale/32/63892.jpg
362438247	FR-0030847	27	4	0	0	2	0	FR	Fabaceae	Tephrosia	Tephrosia candida	http://sesam.senckenberg.de/pictures/originale/32/63893.jpg
317864391	FR-0030848	1	0	0	0	0	0	FR	Bromeliaceae	Fosterella	Fosterella caulescens	http://sesam.senckenberg.de/pictures/originale/32/63894.jpg
317864392	FR-0030849	3	6	0	0	1	3	FR	Bromeliaceae	Fosterella	Fosterella chaparensis	http://sesam.senckenberg.de/pictures/originale/32/63895.jpg
812025066	FR-0030850	2	13	0	0	4	0	FR	Bromeliaceae	Fosterella	Fosterella floridensis	http://sesam.senckenberg.de/pictures/originale/32/63896.jpg
317864393	FR-0030851	17	2	0	0	4	3	FR	Bromeliaceae	Fosterella	Fosterella albicans	http://sesam.senckenberg.de/pictures/originale/32/63898.jpg
684290122	FR-0030852	6	9	0	0	3	0	FR	Bromeliaceae	Fosterella	Fosterella elviragrossiae	http://sesam.senckenberg.de/pictures/originale/32/63899.jpg
736319060	FR-0030853	2	6	0	0	4	0	FR	Bromeliaceae	Fosterella	Fosterella christophii	http://sesam.senckenberg.de/pictures/originale/32/63900.jpg
362426710	FR-0030854	16	22	0	0	11	4	FR	Orobanchaceae	Odontitella	Odontitella virgata	http://sesam.senckenberg.de/pictures/originale/32/63901.jpg
317864438	FR-0030855	12	18	0	0	7	0	FR	Bromeliaceae	Fosterella	Fosterella penduliflora	http://sesam.senckenberg.de/pictures/originale/32/63902.jpg
317864440	FR-0030857	13	24	0	0	6	0	FR	Bromeliaceae	Fosterella	Fosterella penduliflora	http://sesam.senckenberg.de/pictures/originale/32/63906.jpg
317864441	FR-0030858	9	16	0	0	2	0	FR	Bromeliaceae	Fosterella	Fosterella penduliflora	http://sesam.senckenberg.de/pictures/originale/32/63907.jpg
317866864	FR-0030860	67	33	0	0	8	0	FR	Lamiaceae	Killickia	Killickia lutea	http://sesam.senckenberg.de/pictures/originale/32/63912.jpg
317874281	FR-0030861	23	2	0	0	7	0	FR	Asteraceae	Taraxacum	Taraxacum roseopes	http://sesam.senckenberg.de/pictures/originale/32/63913.jpg
317874282	FR-0030862	22	4	0	0	9	0	FR	Asteraceae	Taraxacum	Taraxacum roseopes	http://sesam.senckenberg.de/pictures/originale/32/63915.jpg
317860959	FR-0030863	22	6	0	0	2	0	FR	Convolvulaceae	Convolvulus	Convolvulus tournefortii	http://sesam.senckenberg.de/pictures/originale/32/63916.jpg
362431916	FR-0030864	9	0	16	0	1	0	FR	Cyperaceae	Rhynchospora	Rhynchospora polyphylla	http://sesam.senckenberg.de/pictures/originale/32/63917.jpg
362426904	FR-0030868	5	1	0	0	2	2	FR	Orchidaceae	Ophrys	Ophrys rasbachii	http://sesam.senckenberg.de/pictures/originale/32/16005.jpg
812031995	FR-0030869	7	7	0	0	1	1	FR	Orchidaceae	Serapias	Serapias cordigera	http://sesam.senckenberg.de/pictures/originale/32/16006.jpg
362426907	FR-0030871	4	4	0	0	2	0	FR	Orchidaceae	Ophrys	Ophrys selinensis	http://sesam.senckenberg.de/pictures/originale/32/16009.jpg
620620397	FR-0030872	4	2	0	0	2	0	FR	Orchidaceae	Ophrys	Ophrys selinensis	http://sesam.senckenberg.de/pictures/originale/32/16010.jpg
362426934	FR-0030873	3	16	0	0	3	0	FR	Orchidaceae	Orchis	Orchis mascula	http://sesam.senckenberg.de/pictures/originale/32/16011.jpg
620620399	FR-0030874	3	16	0	0	2	0	FR	Orchidaceae	Orchis	Orchis mascula	http://sesam.senckenberg.de/pictures/originale/32/16012.jpg
362426936	FR-0030875	6	21	0	0	3	0	FR	Orchidaceae	Orchis	Orchis mascula	http://sesam.senckenberg.de/pictures/originale/32/16013.jpg
362426909	FR-0030876	4	4	0	0	3	0	FR	Orchidaceae	Ophrys	Ophrys fusca	http://sesam.senckenberg.de/pictures/originale/32/16014.jpg
362426911	FR-0030877	3	7	0	0	2	4	FR	Orchidaceae	Ophrys	Ophrys fusca	http://sesam.senckenberg.de/pictures/originale/32/63921.jpg
362435086	FR-0030881	17	14	0	0	14	0	FR	Caryophyllaceae	Silene	Silene sieberi	http://sesam.senckenberg.de/pictures/originale/32/63926.jpg
362441296	FR-0030884	10	7	12	0	3	0	FR	Asteraceae	Vernonanthura	Vernonanthura discolor	http://sesam.senckenberg.de/pictures/originale/32/63927.jpg
345766630	FR-0030888	39	0	0	0	5	0	FR	Potamogetonaceae	Potamogeton	Potamogeton friesii	http://sesam.senckenberg.de/pictures/originale/32/63929.jpg
362429726	FR-0030890	8	1	0	0	5	0	FR	Potamogetonaceae	Potamogeton	Potamogeton nodosus	http://sesam.senckenberg.de/pictures/originale/32/63931.jpg
362429971	FR-0030893	12	2	0	0	11	0	FR	Potamogetonaceae	Potamogeton	Potamogeton schreberi	http://sesam.senckenberg.de/pictures/originale/32/63935.jpg
362429973	FR-0030894	10	3	0	0	7	0	FR	Potamogetonaceae	Potamogeton	Potamogeton schreberi	http://sesam.senckenberg.de/pictures/originale/32/63936.jpg
362429976	FR-0030895	5	0	0	0	8	1	FR	Potamogetonaceae	Potamogeton	Potamogeton schreberi	http://sesam.senckenberg.de/pictures/originale/32/63939.jpg
362429978	FR-0030896	9	1	0	0	6	0	FR	Potamogetonaceae	Potamogeton	Potamogeton schreberi	http://sesam.senckenberg.de/pictures/originale/32/63940.jpg
620620583	FR-0030897	3	2	0	0	6	0	FR	Potamogetonaceae	Potamogeton	Potamogeton schreberi	http://sesam.senckenberg.de/pictures/originale/32/63942.jpg
362429862	FR-0030899	9	1	0	0	5	0	FR	Potamogetonaceae	Potamogeton	Potamogeton angustifolius	http://sesam.senckenberg.de/pictures/originale/32/63944.jpg
345766761	FR-0030900	8	1	0	0	3	0	FR	Potamogetonaceae	Potamogeton	Potamogeton salicifolius	http://sesam.senckenberg.de/pictures/originale/32/63949.jpg
362429982	FR-0030901	11	1	0	0	5	0	FR	Potamogetonaceae	Potamogeton	Potamogeton salicifolius	http://sesam.senckenberg.de/pictures/originale/32/63950.jpg
362429888	FR-0030903	5	3	0	0	5	0	FR	Potamogetonaceae	Potamogeton	Potamogeton wrightii	http://sesam.senckenberg.de/pictures/originale/32/63953.jpg
362429897	FR-0030904	11	0	0	0	3	0	FR	Potamogetonaceae	Potamogeton	Potamogeton schweinfurthii	http://sesam.senckenberg.de/pictures/originale/32/63954.jpg
416048696	FR-0030906	15	2	0	0	1	2	FR	Asteraceae	Taraxacum	Taraxacum scolopendrinum	http://sesam.senckenberg.de/pictures/originale/32/63956.jpg
416048697	FR-0030907	13	4	0	0	1	1	FR	Asteraceae	Taraxacum	Taraxacum scolopendrinum	http://sesam.senckenberg.de/pictures/originale/32/63957.jpg
416048606	FR-0030908	31	7	0	0	1	5	FR	Asteraceae	Taraxacum		http://sesam.senckenberg.de/pictures/originale/32/63959.jpg
416048679	FR-0030909	15	3	0	0	5	2	FR	Asteraceae	Taraxacum	Taraxacum pollichii	http://sesam.senckenberg.de/pictures/originale/32/63960.jpg
416048680	FR-0030910	6	2	2	0	7	2	FR	Asteraceae	Taraxacum	Taraxacum pollichii	http://sesam.senckenberg.de/pictures/originale/32/63961.jpg
684289793	FR-0036300	11	5	0	0	6	1	FR	Asteraceae	Zyrphelis	Zyrphelis taxifolia	http://sesam.senckenberg.de/pictures/originale/32/80025.jpg
684289987	FR-0036301	42	0	0	0	5	0	FR	Rubiaceae	Coddia	Coddia rudis	http://sesam.senckenberg.de/pictures/originale/32/80026.jpg
684289988	FR-0036302	42	0	0	0	7	0	FR	Rubiaceae	Coddia	Coddia rudis	http://sesam.senckenberg.de/pictures/originale/32/80027.jpg
684289993	FR-0036303	10	23	0	0	4	0	FR	Combretaceae	Combretum	Combretum collinum	http://sesam.senckenberg.de/pictures/originale/32/80028.jpg
684289761	FR-0036304	17	10	0	0	1	0	FR	Malvaceae	Alcea	Alcea aucheri	http://sesam.senckenberg.de/pictures/originale/32/80029.jpg
684290036	FR-0036305	12	2	0	0	2	0	FR	Malvaceae	Dicellostyles	Dicellostyles axillaris	http://sesam.senckenberg.de/pictures/originale/32/80030.jpg
684290037	FR-0036306	5	1	0	0	2	0	FR	Malvaceae	Dicellostyles	Dicellostyles axillaris	http://sesam.senckenberg.de/pictures/originale/32/80031.jpg
684290038	FR-0036307	13	0	1	0	8	0	FR	Dichapetalaceae	Dichapetalum	Dichapetalum gelonioides	http://sesam.senckenberg.de/pictures/originale/32/80032.jpg
684290479	FR-0036308	3	0	1	0	1	0	FR	Thymelaeaceae	Phaleria	Phaleria capitata	http://sesam.senckenberg.de/pictures/originale/32/80033.jpg
684290051	FR-0036309	22	18	0	0	4	0	FR	Elaeocarpaceae	Elaeocarpus	Elaeocarpus amoenus	http://sesam.senckenberg.de/pictures/originale/32/80034.jpg
684290052	FR-0036310	4	17	1	0	4	0	FR	Elaeocarpaceae	Elaeocarpus	Elaeocarpus amoenus	http://sesam.senckenberg.de/pictures/originale/32/80035.jpg
684290053	FR-0036311	9	10	0	0	2	0	FR	Elaeocarpaceae	Elaeocarpus	Elaeocarpus montanus	http://sesam.senckenberg.de/pictures/originale/32/80036.jpg
684290616	FR-0036312	26	15	0	0	3	0	FR	Malvaceae	Triumfetta	Triumfetta pilosa	http://sesam.senckenberg.de/pictures/originale/32/80037.jpg
684290388	FR-0036313	28	14	0	0	8	0	FR	Malvaceae	Kosteletzkya	Kosteletzkya depressa	http://sesam.senckenberg.de/pictures/originale/32/80038.jpg
684290389	FR-0036314	22	24	0	0	9	0	FR	Malvaceae	Kosteletzkya	Kosteletzkya pentacarpos	http://sesam.senckenberg.de/pictures/originale/32/80039.jpg
684290152	FR-0036315	2	7	0	0	2	0	FR	Malvaceae	Heliocarpus	Heliocarpus velutinus	http://sesam.senckenberg.de/pictures/originale/32/80041.jpg
684289925	FR-0036316	9	5	0	0	3	0	FR	Malvaceae	Abutilon	Abutilon viscosum	http://sesam.senckenberg.de/pictures/originale/32/80043.jpg
684290290	FR-0036317	22	7	0	0	9	1	FR	Asteraceae	Pilosella	Pilosella trigenes	http://sesam.senckenberg.de/pictures/originale/32/80044.jpg
684290625	FR-0036318	39	46	0	0	7	0	FR	Urticaceae	Urtica	Urtica neubaueri	http://sesam.senckenberg.de/pictures/originale/32/80045.jpg
684290391	FR-0036319	15	14	0	1	2	0	FR	Thymelaeaceae	Lachnaea	Lachnaea ericoides	http://sesam.senckenberg.de/pictures/originale/32/80047.jpg
684290603	FR-0036320	17	13	0	0	1	0	FR	Malvaceae	Tilia	Tilia juranyiana	http://sesam.senckenberg.de/pictures/originale/32/80048.jpg
684290604	FR-0036321	15	6	0	0	2	0	FR	Malvaceae	Tilia		http://sesam.senckenberg.de/pictures/originale/32/80049.jpg
684290605	FR-0036322	17	2	4	0	2	0	FR	Malvaceae	Tilia		http://sesam.senckenberg.de/pictures/originale/32/80050.jpg
684290606	FR-0036323	8	0	4	0	1	0	FR	Malvaceae	Tilia		http://sesam.senckenberg.de/pictures/originale/32/80051.jpg
684290607	FR-0036324	11	10	0	0	6	0	FR	Malvaceae	Tilia		http://sesam.senckenberg.de/pictures/originale/32/80052.jpg
684290608	FR-0036325	12	10	0	0	5	0	FR	Malvaceae	Tilia		http://sesam.senckenberg.de/pictures/originale/32/80053.jpg
684290609	FR-0036326	5	0	6	0	1	0	FR	Malvaceae	Tilia		http://sesam.senckenberg.de/pictures/originale/32/80054.jpg
684290551	FR-0036327	14	15	0	0	8	0	FR	Solanaceae	Solanum	Solanum tribulosum	http://sesam.senckenberg.de/pictures/originale/32/80055.jpg
684290548	FR-0036328	5	6	4	0	4	1	FR	Iridaceae	Sisyrinchium	Sisyrinchium tenuifolium	http://sesam.senckenberg.de/pictures/originale/32/80058.jpg
684290613	FR-0036330	23	4	0	0	2	0	FR	Boraginaceae	Trichodesma	Trichodesma zeylanicum	http://sesam.senckenberg.de/pictures/originale/32/80060.jpg
699147397	FR-0036331	14	16	0	0	5	0	FR	Malvaceae	Tilia	Tilia budensis	http://sesam.senckenberg.de/pictures/originale/32/80061.jpg
699147398	FR-0036332	8	9	0	0	5	0	FR	Malvaceae	Tilia	Tilia budensis	http://sesam.senckenberg.de/pictures/originale/32/80062.jpg
684290593	FR-0036333	36	39	0	0	3	0	FR	Malvaceae	Tilia	Tilia platyphyllos	http://sesam.senckenberg.de/pictures/originale/32/80063.jpg
684290594	FR-0036334	35	10	0	0	4	0	FR	Malvaceae	Tilia	Tilia platyphyllos	http://sesam.senckenberg.de/pictures/originale/32/80065.jpg
684290595	FR-0036335	11	6	0	0	4	0	FR	Malvaceae	Tilia	Tilia platyphyllos	http://sesam.senckenberg.de/pictures/originale/32/80168.jpg
684290596	FR-0036336	15	5	0	0	6	0	FR	Malvaceae	Tilia	Tilia platyphyllos	http://sesam.senckenberg.de/pictures/originale/32/80169.jpg
684290597	FR-0036337	14	6	0	0	3	0	FR	Malvaceae	Tilia	Tilia platyphyllos	http://sesam.senckenberg.de/pictures/originale/32/80170.jpg
684290598	FR-0036338	13	0	0	0	2	0	FR	Malvaceae	Tilia	Tilia platyphyllos	http://sesam.senckenberg.de/pictures/originale/32/80171.jpg
684290599	FR-0036339	23	13	0	0	6	0	FR	Malvaceae	Tilia	Tilia platyphyllos	http://sesam.senckenberg.de/pictures/originale/32/80173.jpg
684290600	FR-0036340	18	12	0	0	5	0	FR	Malvaceae	Tilia	Tilia platyphyllos	http://sesam.senckenberg.de/pictures/originale/32/80174.jpg
684290601	FR-0036341	25	24	0	0	5	0	FR	Malvaceae	Tilia	Tilia platyphyllos	http://sesam.senckenberg.de/pictures/originale/32/80175.jpg
684290602	FR-0036342	15	5	0	0	4	0	FR	Malvaceae	Tilia	Tilia platyphyllos	http://sesam.senckenberg.de/pictures/originale/32/80177.jpg
684289783	FR-0036343	43	9	0	0	5	0	FR	Fabaceae	Aspalathus	Aspalathus plukenetiana	http://sesam.senckenberg.de/pictures/originale/32/80179.jpg
684290521	FR-0036345	14	5	5	0	9	0	FR	Ranunculaceae	Ranunculus	Ranunculus petiolaris	http://sesam.senckenberg.de/pictures/originale/32/80181.jpg
684290544	FR-0036346	4	10	0	0	10	0	FR	Nyctaginaceae	Cyphomeris	Cyphomeris gypsophiloides	http://sesam.senckenberg.de/pictures/originale/32/80182.jpg
684290151	FR-0036347	15	24	0	0	14	0	FR	Asteraceae	Helianthus	Helianthus rugosus	http://sesam.senckenberg.de/pictures/originale/32/80225.jpg
684290127	FR-0036349	43	2	10	0	10	0	FR	Rubiaceae	Galium	Galium aschenbornii	http://sesam.senckenberg.de/pictures/originale/32/80227.jpg
684290087	FR-0036350	16	0	0	0	2	1	FR	Euphorbiaceae	Euphorbia	Euphorbia velligera	http://sesam.senckenberg.de/pictures/originale/32/80228.jpg
684290085	FR-0036351	11	20	0	0	13	0	FR	Euphorbiaceae	Euphorbia	Euphorbia graminea	http://sesam.senckenberg.de/pictures/originale/32/80229.jpg
684290084	FR-0036352	28	4	0	0	4	0	FR	Euphorbiaceae	Euphorbia	Euphorbia esuliformis	http://sesam.senckenberg.de/pictures/originale/32/80230.jpg
684290082	FR-0036353	15	11	0	0	4	0	FR	Asteraceae	Kyrsteniopsis	Kyrsteniopsis spinaciifolia	http://sesam.senckenberg.de/pictures/originale/32/80231.jpg
684290014	FR-0036355	16	1	0	0	0	1	FR	Fabaceae	Crotalaria	Crotalaria leptoclona	http://sesam.senckenberg.de/pictures/originale/32/80233.jpg
684290005	FR-0036357	9	1	0	0	3	0	FR	Melastomataceae	Leandra	Leandra cornoides	http://sesam.senckenberg.de/pictures/originale/32/80235.jpg
684290006	FR-0036358	16	26	0	0	7	0	FR	Melastomataceae	Leandra	Leandra cornoides	http://sesam.senckenberg.de/pictures/originale/32/80236.jpg
684290737	FR-0036359	6	2	0	0	1	0	FR	Asteraceae	Xanthocephalum	Xanthocephalum centauroides	http://sesam.senckenberg.de/pictures/originale/32/80237.jpg
684290585	FR-0036360	32	47	0	0	7	0	FR	Lauraceae	Licaria	Licaria triandra	http://sesam.senckenberg.de/pictures/originale/32/80238.jpg
684290541	FR-0036361	7	37	0	0	8	0	FR	Asteraceae	Senecio	Senecio mulgediifolius	http://sesam.senckenberg.de/pictures/originale/32/80239.jpg
684290542	FR-0036362	3	0	0	0	0	0	FR	Asteraceae	Senecio	Senecio mulgediifolius	http://sesam.senckenberg.de/pictures/originale/32/80240.jpg
684290405	FR-0036364	28	5	0	0	12	0	FR	Asteraceae	Jefea	Jefea lantanifolia	http://sesam.senckenberg.de/pictures/originale/32/80242.jpg
684290062	FR-0036368	4	1	0	0	2	0	FR	Asteraceae	Erigeron	Erigeron diplopappoides	http://sesam.senckenberg.de/pictures/originale/32/80246.jpg
684290025	FR-0036369	44	15	0	0	4	0	FR	Fabaceae	Dalea	Dalea zimapanica	http://sesam.senckenberg.de/pictures/originale/32/80247.jpg
684290026	FR-0036370	30	5	0	0	7	0	FR	Fabaceae	Dalea	Dalea melantha	http://sesam.senckenberg.de/pictures/originale/32/80248.jpg
684290027	FR-0036371	24	5	0	0	4	0	FR	Fabaceae	Dalea	Dalea macrotropis	http://sesam.senckenberg.de/pictures/originale/32/80250.jpg
684290022	FR-0036372	30	5	1	0	5	1	FR	Fabaceae	Dalea	Dalea lachnantha	http://sesam.senckenberg.de/pictures/originale/32/80251.jpg
684290023	FR-0036373	30	11	0	0	9	1	FR	Fabaceae	Dalea	Dalea humilis	http://sesam.senckenberg.de/pictures/originale/32/80252.jpg
684289919	FR-0036374	10	26	0	0	1	0	FR	Asteraceae	Baccharis	Baccharis heterophylla	http://sesam.senckenberg.de/pictures/originale/32/80253.jpg
684289918	FR-0036377	19	4	0	0	3	0	FR	Asteraceae	Baccharis	Baccharis asperula	http://sesam.senckenberg.de/pictures/originale/32/80256.jpg
684290018	FR-0036378	5	1	0	0	3	0	FR	Liliaceae	Calochortus	Calochortus barbatus	http://sesam.senckenberg.de/pictures/originale/32/80257.jpg
684290016	FR-0036379	19	4	1	0	4	0	FR	Euphorbiaceae	Croton	Croton shepherdiaefolius	http://sesam.senckenberg.de/pictures/originale/32/80258.jpg
684290543	FR-0036380	11	9	0	0	10	0	FR	Asteraceae	Senecio	Senecio picridis	http://sesam.senckenberg.de/pictures/originale/32/80259.jpg
684290291	FR-0036381	17	6	0	0	7	1	FR	Asteraceae	Pilosella	Pilosella trigenes	http://sesam.senckenberg.de/pictures/originale/32/80260.jpg
684290214	FR-0036382	9	4	0	0	4	4	FR	Asteraceae	Pilosella	Pilosella corymbuloides	http://sesam.senckenberg.de/pictures/originale/32/80261.jpg
775295714	FR-0036383	23	4	0	0	4	3	FR	Asteraceae	Pilosella	Pilosella hypeurya	http://sesam.senckenberg.de/pictures/originale/32/80262.jpg
684290185	FR-0036384	14	4	0	0	7	2	FR	Asteraceae	Pilosella	Pilosella glomerata	http://sesam.senckenberg.de/pictures/originale/32/80263.jpg
736318374	FR-0036385	70	38	0	0	4	2	FR	Asteraceae	Centaurea	Centaurea leucophaea	http://sesam.senckenberg.de/pictures/originale/32/80264.jpg
684290247	FR-0036386	22	13	0	0	15	0	FR	Asteraceae	Hieracium	Hieracium virgicaule	http://sesam.senckenberg.de/pictures/originale/32/80265.jpg
812026156	FR-0036387	40	21	0	0	8	0	FR	Asteraceae	Hieracium	Hieracium virgicaule	http://sesam.senckenberg.de/pictures/originale/32/80266.jpg
684290173	FR-0036388	17	7	0	0	11	3	FR	Asteraceae	Hieracium	Hieracium cruentum	http://sesam.senckenberg.de/pictures/originale/32/80268.jpg
684290174	FR-0036389	8	2	0	0	8	1	FR	Asteraceae	Hieracium	Hieracium cruentum	http://sesam.senckenberg.de/pictures/originale/32/80269.jpg
684290186	FR-0036390	23	2	0	0	6	0	FR	Asteraceae	Pilosella	Pilosella hypeurya	http://sesam.senckenberg.de/pictures/originale/32/80270.jpg
736319261	FR-0036391	10	8	1	0	8	1	FR	Asteraceae	Pilosella	Pilosella blyttiana	http://sesam.senckenberg.de/pictures/originale/32/80271.jpg
684290190	FR-0036392	12	21	1	0	14	0	FR	Asteraceae	Pilosella	Pilosella leptoclados	http://sesam.senckenberg.de/pictures/originale/32/80272.jpg
684290191	FR-0036393	11	15	0	0	12	0	FR	Asteraceae	Pilosella	Pilosella leptoclados	http://sesam.senckenberg.de/pictures/originale/32/80274.jpg
684290267	FR-0036394	8	9	0	0	10	4	FR	Asteraceae	Hieracium	Hieracium illegitimum	http://sesam.senckenberg.de/pictures/originale/32/80276.jpg
684290177	FR-0036395	0	6	0	0	9	0	FR	Asteraceae	Pilosella	Pilosella fallacina	http://sesam.senckenberg.de/pictures/originale/32/79568.jpg
436951392	P00446893	32	0	0	0	9	2	P_Test	Zygophyllaceae	Tribulus	Tribulus terrestris	http://mediaphoto.mnhn.fr/media/1441346920432a3RwaTkzNhMzmjuP
436951393	P00446896	24	2	0	0	1	2	P_Test	Zygophyllaceae	Tribulus	Tribulus terrestris	http://mediaphoto.mnhn.fr/media/1441346920487NAAklGsCj45kePDm
436951394	P00446898	22	0	0	0	2	0	P_Train	Zygophyllaceae	Tribulus	Tribulus terrestris	http://mediaphoto.mnhn.fr/media/1441346920523sylwyv31D5qCHVls
436951406	P00712170	12	2	10	0	5	0	P_Test	Geraniaceae	Geranium	Geranium robertianum	http://mediaphoto.mnhn.fr/media/1444493584962qYOyYqFgtLWaiYYk
436951420	P00695905	0	9	0	0	11	1	P_Test	Primulaceae	Cyclamen	Cyclamen hederifolium	http://mediaphoto.mnhn.fr/media/1441452861889S5gKlsuFUkavm54s
436951425	P00122964	7	0	3	0	7	0	P_Test	Fabaceae	Derris	Derris trifoliata	http://mediaphoto.mnhn.fr/media/1441342381067cbz08kbSnfbnpw9V
436951439	P0010589	25	4	0	0	10	1	P_Test	Asteraceae	Erythrocephalum	Erythrocephalum longifolium	http://mediaphoto.mnhn.fr/media/14413432600563yuiyOPHIiiugo5g
436951449	P0010924	7	5	4	0	7	0	P_Test	Asteraceae	Erythrocephalum	Erythrocephalum marginatum	http://mediaphoto.mnhn.fr/media/1441343260724aMLTyA7LZFWQLCle
436951456	P0010973	22	11	0	0	8	0	P_Train	Asteraceae	Dicoma	Dicoma anomala	http://mediaphoto.mnhn.fr/media/1441343283946TEMSouBQ5wfK6qJ7
436951492	P00118386	23	3	0	0	9	0	P_Test	Fabaceae	Crotalaria	Crotalaria tanety	http://mediaphoto.mnhn.fr/media/1441335170364QfygRdQQYmQ74a9e
436951494	P00735962	16	11	0	0	1	0	P_Test	Fabaceae	Crotalaria	Crotalaria tanety	http://mediaphoto.mnhn.fr/media/1441335319679t8myRCfcQjHO91qQ
436951539	P00735357	19	0	1	0	10	0	P_Test	Fabaceae	Crotalaria	Crotalaria poissonii	http://mediaphoto.mnhn.fr/media/14413351415910m8jpV26OrWHaXg7
436951577	P028516	18	13	0	0	1	1	P_Test	Asteraceae	Grangea	Grangea maderaspatana	http://mediaphoto.mnhn.fr/media/1441346221153XU6UMJ0NwLG95Vwt
436951625	P00291819	6	1	0	0	1	0	P_Test	Asteraceae	Xerochrysum	Xerochrysum bracteatum	http://mediaphoto.mnhn.fr/media/1442491436356k0TpxYyOQJf2UBSe
436951989	P0011276	6	1	0	0	2	0	P_Test	Asteraceae	Oldenburgia	Oldenburgia grandis	http://mediaphoto.mnhn.fr/media/1441342985936qCWNlp22Y0UPzQes
436952037	P0011307	2	1	0	0	2	1	P_Test	Asteraceae	Gerbera		http://mediaphoto.mnhn.fr/media/1441343261251h9Ye8D9vYdHCFAxy
436952038	P0011305	8	5	0	0	6	3	P_Test	Asteraceae	Gerbera		http://mediaphoto.mnhn.fr/media/1441343261212mQOifkBqyrngf621
436952151	P00037641	5	8	0	0	5	0	P_Train	Asteraceae	Helichrysum	Helichrysum forskahlii	http://mediaphoto.mnhn.fr/media/1441343341698f6UhH7qonvOh7AHu
436952159	P00729986	32	19	1	0	8	0	P_Test	Fabaceae	Vicia	Vicia sativa	http://mediaphoto.mnhn.fr/media/1441349175896CLlbHIQYfSMv4vVy
436952171	P00569754	17	2	0	0	10	0	P_Test	Malvaceae	Kosteletzkya	Kosteletzkya reflexiflora	http://mediaphoto.mnhn.fr/media/1441390267201KLNX7R2oeI0YCwye
436952178	P00569746	23	2	0	0	9	0	P_Train	Malvaceae	Kosteletzkya	Kosteletzkya reflexiflora	http://mediaphoto.mnhn.fr/media/1441390267043caOtnzAzMrpyN9xv
436952179	P00569772	2	5	0	0	1	0	P_Test	Malvaceae	Kosteletzkya	Kosteletzkya macrantha	http://mediaphoto.mnhn.fr/media/1441390291652VPbWUlM01bYQgpQT
436952211	P0011412	2	1	0	0	4	1	P_Test	Asteraceae	Gerbera	Gerbera jamesonii	http://mediaphoto.mnhn.fr/media/1441343304037pUyyN0u8mTpjzrXV
436952258	P00083993	19	18	0	0	7	0	P_Test	Apocynaceae	Plectaneia	Plectaneia thouarsii	http://mediaphoto.mnhn.fr/media/1441369915408jv3pbTGmaUuZrLwq
436952268	P00087328	16	0	3	0	6	0	P_Test	Apocynaceae	Plectaneia	Plectaneia thouarsii	http://mediaphoto.mnhn.fr/media/14413707248676bw1WWRRah23HkCK
436952269	P00087319	18	0	13	0	2	0	P_Test	Apocynaceae	Plectaneia	Plectaneia thouarsii	http://mediaphoto.mnhn.fr/media/1441369926742Be4ESjKI6Pzb5oia
436952274	P00087273	12	0	1	0	3	0	P_Test	Apocynaceae	Plectaneia	Plectaneia thouarsii	http://mediaphoto.mnhn.fr/media/14413699143297rZGuPFKG216P8k5
436952275	P00087272	18	0	1	0	2	0	P_Test	Apocynaceae	Plectaneia	Plectaneia thouarsii	http://mediaphoto.mnhn.fr/media/1441369914309wLc0PDYZu4gmywd5
436952280	P00087242	37	26	0	0	2	0	P_Test	Apocynaceae	Plectaneia	Plectaneia thouarsii	http://mediaphoto.mnhn.fr/media/1441369916156HDAUdAwjoEUkQCm0
436952282	P00087222	8	0	2	0	8	0	P_Test	Apocynaceae	Plectaneia	Plectaneia thouarsii	http://mediaphoto.mnhn.fr/media/1441369915750XiJ3mvcMwpZDknvm
436952290	P00087140	0	0	10	0	7	0	P_Test	Apocynaceae	Plectaneia	Plectaneia thouarsii	http://mediaphoto.mnhn.fr/media/1441371081841vrMa5PJ3XykOUXhO
436952292	P00087010	14	6	2	0	6	0	P_Test	Apocynaceae	Plectaneia	Plectaneia thouarsii	http://mediaphoto.mnhn.fr/media/1441368392918m3p4POwpCHPt5POU
436952293	P00083991	28	6	0	0	9	0	P_Test	Apocynaceae	Plectaneia	Plectaneia thouarsii	http://mediaphoto.mnhn.fr/media/1441369915351vMPxMiZ3GnIPL15j
436952298	P00548022	13	0	1	0	2	0	P_Test	Apocynaceae	Oncinotis	Oncinotis tomentella	http://mediaphoto.mnhn.fr/media/1441370074118bjnmuFNlGDeLxWsh
436952299	P00547998	19	23	0	0	4	0	P_Test	Apocynaceae	Oncinotis	Oncinotis tomentella	http://mediaphoto.mnhn.fr/media/14413700593400KX9wPR91MTyoJGZ
436952300	P00554954	8	0	2	0	4	0	P_Test	Apocynaceae	Oncinotis	Oncinotis tomentella	http://mediaphoto.mnhn.fr/media/1441370074366Ak0qncgf0VW7mZ6I
436952302	P00548023	43	23	0	0	6	0	P_Test	Apocynaceae	Oncinotis	Oncinotis tomentella	http://mediaphoto.mnhn.fr/media/1441370074138422BaVzrwrJ0Jvci
436952303	P00548030	15	24	0	0	9	0	P_Test	Apocynaceae	Oncinotis	Oncinotis tomentella	http://mediaphoto.mnhn.fr/media/1441370074223Uuc2KC1TXKEyVa57
436952304	P00162063	25	9	0	0	6	0	P_Test	Apocynaceae	Oncinotis	Oncinotis tomentella	http://mediaphoto.mnhn.fr/media/1442360516759ybeysbWN2mQsB0yZ
436952363	P029930	7	1	0	0	1	0	P_Test	Asteraceae	Conyza	Conyza pyrrhopappa	http://mediaphoto.mnhn.fr/media/1441344222179k5Lm6U5IBfHsbmDw
436952428	P00559748	16	0	0	0	5	0	P_Test	Malvaceae	Thespesia	Thespesia gummiflua	http://mediaphoto.mnhn.fr/media/1441389578058XJmouHtQZDWM14UM
436952454	P015034	5	1	0	0	2	0	P_Test	Asteraceae	Sonchus	Sonchus oleraceus	http://mediaphoto.mnhn.fr/media/1441342983860PwafQQytLpYPnVdT
436952455	P015044	7	1	3	0	7	0	P_Test	Asteraceae	Sonchus	Sonchus oleraceus	http://mediaphoto.mnhn.fr/media/14413429840502VHT30FFKKSjIu3o
436952460	P015053	9	2	3	0	3	0	P_Test	Asteraceae	Sonchus	Sonchus asper	http://mediaphoto.mnhn.fr/media/1441342984216LraBS6wMsSYiBuDv
436952481	P015581	5	1	2	0	1	2	P_Test	Orchidaceae	Oeceoclades		http://mediaphoto.mnhn.fr/media/1441306797303F3Mi9CCLGprRgr4u
436952485	P015615	10	2	0	0	5	0	P_Test	Ericaceae	Comarostaphylis	Comarostaphylis discolor	http://mediaphoto.mnhn.fr/media/1441393097897ZaLnhcqQibZc82cS
436952489	P015647	31	10	1	0	5	0	P_Test	Rubiaceae	Nernstia	Nernstia mexicana	http://mediaphoto.mnhn.fr/media/1441388230705kaX6KB0GuKZmPLFH
436952516	P030174	17	0	8	0	4	0	P_Test	Myrtaceae	Myrcianthes	Myrcianthes crebrifolia	http://mediaphoto.mnhn.fr/media/14413965446327W1wbbH3Le6X45FS
436952517	P030173	12	0	6	0	1	0	P_Test	Myrtaceae	Myrcianthes	Myrcianthes crebrifolia	http://mediaphoto.mnhn.fr/media/1441396544601xhYNMKmpCn93w0Br
436952577	P0000262	7	9	0	0	7	0	P_Test	Asteraceae	Senecio	Senecio ruwenzoriensis	http://mediaphoto.mnhn.fr/media/1441342886563ianVwscub9g1EkyX
436952581	P0000328	10	5	0	0	1	0	P_Test	Asteraceae	Senecio	Senecio serratuloides	http://mediaphoto.mnhn.fr/media/1441343126955TabqRu83kTOkVQa3
436952594	P0000631	11	0	4	0	6	1	P_Test	Asteraceae	Senecio	Senecio subsessilis	http://mediaphoto.mnhn.fr/media/1441342934685lE1YeBdK6bedFmgv
436952755	P00736052	70	0	3	0	1	0	P_Test	Solanaceae	Solanum	Solanum heinianum	http://mediaphoto.mnhn.fr/media/1441380779570eTp6vCFDhB5YNf5i
436952758	P00080507	8	1	0	0	2	0	P_Test	Solanaceae	Solanum		http://mediaphoto.mnhn.fr/media/1453444469039xirx3ZbONR9Dx7kd
436952760	P00593219	8	0	1	0	0	0	P_Test	Solanaceae	Solanum		http://mediaphoto.mnhn.fr/media/1441370759480smkWeIgyG6laTFDG
436952769	P00571139	2	3	0	0	2	0	P_Test	Solanaceae	Solanum	Solanum stellatiglandulosum	http://mediaphoto.mnhn.fr/media/14521296815761G5a0uY8YuFkILLJ
436952781	P00343470	10	0	5	0	7	0	P_Test	Solanaceae	Solanum		http://mediaphoto.mnhn.fr/media/1441366295768Qgh56SK4M42W2YLv
436952784	P00157198	11	5	0	0	1	1	P_Test	Solanaceae	Solanum	Solanum tarderemotum	http://mediaphoto.mnhn.fr/media/14413400379394qxnARZfhUhYY6nW
436952785	P00226383	8	0	2	0	3	0	P_Test	Cucurbitaceae	Melothria	Melothria pendula	http://mediaphoto.mnhn.fr/media/1441442115609S7XxzzIJvoOmX0RL
436952828	P015225	6	1	0	0	5	0	P_Test	Asteraceae	Sonchus	Sonchus schweinfurthii	http://mediaphoto.mnhn.fr/media/14413429829200cZgHa8uyAe2564W
436952829	P015214	3	1	2	0	8	0	P_Test	Asteraceae	Sonchus	Sonchus schweinfurthii	http://mediaphoto.mnhn.fr/media/1441342982712Z5IVPp0w18xB1HMt
436952830	P015545	7	21	0	0	6	0	P_Test	Asteraceae	Lactuca	Lactuca praevia	http://mediaphoto.mnhn.fr/media/14413430043724SYlMrbJNpzjS1EO
436952832	P015564	5	16	0	0	7	0	P_Test	Asteraceae	Lactuca	Lactuca schweinfurthii	http://mediaphoto.mnhn.fr/media/1441343004722Wr49HieFQMiSTRyC
436952834	P00233405	11	6	6	0	0	0	P_Test	Asteraceae	Launaea	Launaea capitata	http://mediaphoto.mnhn.fr/media/1441342826545dlnEdlRVbVsP1yKp
436952846	P016084	1	3	6	0	4	0	P_Test	Asteraceae	Launaea	Launaea rarifolia	http://mediaphoto.mnhn.fr/media/144134299471812PFEtNWBpJ94Uns
436952847	P016071	0	35	0	0	8	1	P_Train	Asteraceae	Launaea	Launaea rarifolia	http://mediaphoto.mnhn.fr/media/1441342994470RDRK7TTNPITdCWBE
436952848	P016069	3	10	0	0	7	1	P_Test	Asteraceae	Launaea	Launaea rarifolia	http://mediaphoto.mnhn.fr/media/1441342994434PTkGiw1ZWAm14eCT
436952881	P00724741	3	5	0	0	1	0	P_Test	Fabaceae	Bauhinia	Bauhinia monandra	http://mediaphoto.mnhn.fr/media/1441333261575TP2BxObNkHwD8HTD
436952882	P00131696	6	0	0	0	2	0	P_Test	Fabaceae	Bauhinia	Bauhinia monandra	http://mediaphoto.mnhn.fr/media/14413334445562SBsKVYRHk5z53GK
436952935	P0000647	14	0	22	0	9	0	P_Test	Asteraceae	Senecio	Senecio syringifolius	http://mediaphoto.mnhn.fr/media/1441342892898x4gB9I6DgtybLW1W
436952975	P015407	12	11	0	0	11	0	P_Train	Asteraceae	Lactuca	Lactuca inermis	http://mediaphoto.mnhn.fr/media/1441342864489TPx080mmm4lMIWCk
436953001	P00186004	15	17	0	0	8	0	P_Test	Siparunaceae	Siparuna	Siparuna guianensis	http://mediaphoto.mnhn.fr/media/1441303629435dnzaOp4S334HxONH
436953003	P00080498	7	20	0	0	7	0	P_Test	Siparunaceae	Siparuna	Siparuna guianensis	http://mediaphoto.mnhn.fr/media/14413047773547cwwNZUurEFBKGVi
436953004	P00047274	9	0	0	0	2	0	P_Test	Siparunaceae	Siparuna	Siparuna guianensis	http://mediaphoto.mnhn.fr/media/14189081299276HMjoadid0NCOc5r
436953005	P00065981	8	0	2	0	3	0	P_Test	Siparunaceae	Siparuna	Siparuna guianensis	http://mediaphoto.mnhn.fr/media/1453133401909xWU6okqE6ALYAQ5k
436953008	P00060090	11	10	0	0	8	0	P_Train	Siparunaceae	Siparuna	Siparuna guianensis	http://mediaphoto.mnhn.fr/media/1453133348778WClG587MBH3coiBm
436953010	P00053300	6	0	5	0	5	0	P_Test	Siparunaceae	Siparuna	Siparuna guianensis	http://mediaphoto.mnhn.fr/media/1418908215142Q5GtTsu63ktbvrnT
436953014	P00061799	15	5	5	0	6	0	P_Test	Siparunaceae	Siparuna	Siparuna guianensis	http://mediaphoto.mnhn.fr/media/14531333988060L2SJtNWgeDQDFDJ
436953015	P00053238	15	11	0	0	3	0	P_Train	Siparunaceae	Siparuna	Siparuna guianensis	http://mediaphoto.mnhn.fr/media/14189081900041IcYqcZH5COKVZkG
436953024	P00052937	12	5	0	0	3	0	P_Test	Siparunaceae	Siparuna	Siparuna guianensis	http://mediaphoto.mnhn.fr/media/1453133426720WvCXNWyPhzQnlMYE
436953071	P00138892	19	1	0	0	5	0	P_Test	Asteraceae	Helichrysum		http://mediaphoto.mnhn.fr/media/1441342901738NJq7yQWs8O5aRZ3H
436953077	P018152	14	1	0	0	4	0	P_Test	Asteraceae	Helichrysum		http://mediaphoto.mnhn.fr/media/1441344627972B93wV4FDDUwUQ8cM
436953107	P00138895	6	1	0	0	2	1	P_Test	Asteraceae	Helichrysum		http://mediaphoto.mnhn.fr/media/1441342901793p4Rl5d2KBtNG7Yet
436953152	P00429155	6	0	1	0	2	0	P_Test	Siparunaceae	Siparuna	Siparuna decipiens	http://mediaphoto.mnhn.fr/media/1441302961597EK9S2IWsOwSy5hGv
436953154	P00070043	3	1	0	0	2	0	P_Test	Siparunaceae	Siparuna	Siparuna decipiens	http://mediaphoto.mnhn.fr/media/1441303629346IavXB70klUoFLicg
436953162	P016893	6	0	0	0	5	0	P_Test	Siparunaceae	Siparuna	Siparuna decipiens	http://mediaphoto.mnhn.fr/media/1441303637196rTtW05B86hZCBBRU
436953163	P016888	8	0	0	0	5	0	P_Test	Siparunaceae	Siparuna	Siparuna decipiens	http://mediaphoto.mnhn.fr/media/1441303800041QpbLFUDnOA8IBCN6
436953164	P016883	13	0	5	0	6	0	P_Test	Siparunaceae	Siparuna	Siparuna decipiens	http://mediaphoto.mnhn.fr/media/1441303799950COPYus1rgXdnPUex
436953165	P016882	7	4	0	0	5	0	P_Test	Siparunaceae	Siparuna	Siparuna decipiens	http://mediaphoto.mnhn.fr/media/1441303799931OpF0drrznh7OjWQK
436953200	P030276	7	0	2	0	1	0	P_Test	Annonaceae	Uvaria	Uvaria manjensis	http://mediaphoto.mnhn.fr/media/1442245596801CyCtaYUV5Bqh6tNH
436953201	P030274	14	0	2	0	7	0	P_Train	Annonaceae	Uvaria	Uvaria manjensis	http://mediaphoto.mnhn.fr/media/1442245591531sybLNATqcyWzbPrt
436953203	P030289	7	0	8	0	5	0	P_Train	Annonaceae	Artabotrys	Artabotrys luxurians	http://mediaphoto.mnhn.fr/media/1442245622333I5RvDhvooxubVYCH
436953215	P030330	13	0	1	0	2	0	P_Test	Annonaceae	Monanthotaxis	Monanthotaxis malacophylla	http://mediaphoto.mnhn.fr/media/1442248795565Ypyl2cBo2GB3X8ek
436953224	P00309936	17	31	0	0	9	0	P_Test	Fabaceae	Albizia	Albizia bernieri	http://mediaphoto.mnhn.fr/media/1441333595610U0LIHscTB3b2dCNr
436953233	P00448521	18	35	0	0	9	0	P_Test	Fabaceae	Albizia	Albizia androyensis	http://mediaphoto.mnhn.fr/media/14413353723411vpeExm20qO2h4Ye
436953243	P00458377	32	3	2	0	6	0	P_Test	Fabaceae	Albizia	Albizia masikororum	http://mediaphoto.mnhn.fr/media/1441333694474r6Qxg61WxslGTgUz
436953252	P00464489	13	2	0	0	8	0	P_Test	Fabaceae	Mimosa	Mimosa grandidieri	http://mediaphoto.mnhn.fr/media/1441333445299rTW5NZsCa50Zqqn5
436953297	P0001440	13	1	12	0	9	0	P_Test	Asteraceae	Kleinia	Kleinia amaniensis	http://mediaphoto.mnhn.fr/media/1441343318476oo5zSdewPCGQsX6M
436953374	P022569	9	1	0	0	1	1	P_Train	Asteraceae	Vernonia	Vernonia nigritiana	http://mediaphoto.mnhn.fr/media/1441342079466yJJYAv1ZkKO4HXzq
436953407	P00053121	3	1	1	0	0	2	P_Test	Orchidaceae	Polystachya	Polystachya concreta	http://mediaphoto.mnhn.fr/media/1441305205124pQFpfAeLQsfAoBTI
436953409	P00615090	4	1	2	0	2	2	P_Test	Orchidaceae	Polystachya	Polystachya concreta	http://mediaphoto.mnhn.fr/media/1441305202890rJHmFpA9klpHPfgN
436953419	P016901	3	0	0	0	2	1	P_Test	Orchidaceae	Polystachya	Polystachya concreta	http://mediaphoto.mnhn.fr/media/1480350210535yvRn5nOqz5U72Vj4
436953431	P016905	0	1	8	6	2	0	P_Test	Fabaceae	Mucuna		http://mediaphoto.mnhn.fr/media/14743849231682c1VfH6VJVYbzsfs
436953439	P020097	22	41	0	0	3	0	P_Test	Asteraceae	Vernoniastrum	Vernoniastrum camporum	http://mediaphoto.mnhn.fr/media/1441342332254HMDK7IJFNnLuPgLJ
436953456	P00298622	19	0	8	0	13	0	P_Test	Rhamnaceae	Colubrina	Colubrina articulata	http://mediaphoto.mnhn.fr/media/14414517010327VByzsju3zgy07gf
436953465	P00100035	0	12	0	0	18	0	P_Test	Fabaceae	Neoapaloxylon	Neoapaloxylon tuberosum	http://mediaphoto.mnhn.fr/media/1441333147739pa7cRH52RhOtAM39
436953467	P00100021	10	0	13	0	14	0	P_Test	Fabaceae	Neoapaloxylon	Neoapaloxylon tuberosum	http://mediaphoto.mnhn.fr/media/1441353846488WLKmZrG0h5uyaJqX
436953476	P00233046	28	4	0	0	10	0	P_Test	Asteraceae	Bidens	Bidens kilimandscharica	http://mediaphoto.mnhn.fr/media/1441343229686lknnTyJT8TKa3YjM
436953486	P00477260	0	4	0	0	14	0	P_Test	Apocynaceae	Cynanchum	Cynanchum arenarium	http://mediaphoto.mnhn.fr/media/14413701283638AovQqDKUNI2qeOw
436953490	P001817	0	9	2	0	9	0	P_Test	Apocynaceae	Cynanchum	Cynanchum arenarium	http://mediaphoto.mnhn.fr/media/1441370109313LDTh8MSX30tjMgFo
436953492	P00643307	58	6	1	0	19	0	P_Test	Apocynaceae	Pleurostelma	Pleurostelma cernuum	http://mediaphoto.mnhn.fr/media/1441370828684bOMOMAQrQXjnUpSh
436953507	P00085406	12	0	3	0	9	0	P_Test	Fabaceae	Macrotyloma	Macrotyloma axillare	http://mediaphoto.mnhn.fr/media/1441342330202A9mOmEigRZHdNgA1
436953528	P0001838	2	2	0	0	1	0	P_Test	Fabaceae	Strongylodon	Strongylodon craveniae	http://mediaphoto.mnhn.fr/media/1441335641482Z3PmeTntQjJVEF7e
436953531	P00339212	0	8	0	0	4	0	P_Test	Fabaceae	Strongylodon	Strongylodon craveniae	http://mediaphoto.mnhn.fr/media/1441342063281gamul4E3ixlQVzqN
436953548	P00730004	10	0	0	0	2	0	P_Train	Fabaceae	Xanthocercis	Xanthocercis madagascariensis	http://mediaphoto.mnhn.fr/media/1441352238470JgPTCXBRMWFfEiyv
436953549	P00754795	38	0	7	0	6	0	P_Test	Fabaceae	Xanthocercis	Xanthocercis madagascariensis	http://mediaphoto.mnhn.fr/media/14413338413224v8TlYjQQyDl5d5n
436953895	P00123200	8	0	12	0	3	1	P_Train	Asteraceae	Cyanthillium	Cyanthillium cinereum	http://mediaphoto.mnhn.fr/media/1441360698159AER0uLnCwq3ENZLp
436953999	P00109446	8	20	0	0	12	0	P_Test	Salicaceae	Homalium	Homalium africanum	http://mediaphoto.mnhn.fr/media/1442346169803oiioWb9wj5T8CKpX
436954083	P00213429	11	1	0	0	2	0	P_Test	Violaceae	Rinorea	Rinorea monticola	http://mediaphoto.mnhn.fr/media/1441341712821u7NVaHw7hZnjiA0w
436954091	P00309668	17	0	13	0	7	0	P_Test	Violaceae	Rinorea	Rinorea squamosa	http://mediaphoto.mnhn.fr/media/1441432467661UTbkqoM7tttqVFaa
436954092	P00209706	24	6	3	0	6	0	P_Test	Violaceae	Rinorea	Rinorea squamosa	http://mediaphoto.mnhn.fr/media/1441341670274MBMUIokJeKrfSflT
436954103	P00364879	2	9	0	0	7	0	P_Train	Anacardiaceae	Micronychia	Micronychia macrophylla	http://mediaphoto.mnhn.fr/media/1442247967707iKxjzRU1nnjgC60u
436954137	P00427465	7	2	0	0	3	0	P_Train	Convolvulaceae	Ipomoea	Ipomoea desmophylla	http://mediaphoto.mnhn.fr/media/144136744307480RdNahSlkSObPro
436954159	P00233843	30	28	0	0	8	0	P_Test	Malvaceae	Grewia		http://mediaphoto.mnhn.fr/media/1441390418356S5CSSwGzx6hokseC
436954188	P00262663	16	21	0	0	5	0	P_Train	Malvaceae	Grewia		http://mediaphoto.mnhn.fr/media/1441390862068jaHohlJqftrFSqzo
436954223	P00490849	21	0	3	0	14	0	P_Test	Sarcolaenaceae	Sarcolaena	Sarcolaena oblongifolia	http://mediaphoto.mnhn.fr/media/1441387235260IUAAk4uvsrLZ96KS
436954230	P00490871	24	0	2	0	5	0	P_Test	Sarcolaenaceae	Sarcolaena	Sarcolaena oblongifolia	http://mediaphoto.mnhn.fr/media/1441387235685ilmGUBm6SJ5fljMR
436954348	P00067289	126	0	0	0	7	2	P_Train	Aspleniaceae	Asplenium	Asplenium aethiopicum	http://mediaphoto.mnhn.fr/media/1441295619399fQHwy4QPvhMOe8Aq
436954354	P00592344	5	0	5	0	2	0	P_Train	Rubiaceae	Coffea		http://mediaphoto.mnhn.fr/media/1441386641486UbVgFm7RdxFDQTOY
436954355	P00592276	3	0	7	0	2	0	P_Train	Rubiaceae	Coffea		http://mediaphoto.mnhn.fr/media/1441386641467q2fYVVV2yhEOHzXa
436954401	P00621064	7	0	9	0	1	0	P_Train	Asteraceae	Brachylaena		http://mediaphoto.mnhn.fr/media/1441358664623r7E14J9eO0IbYSZ8
436954403	P00621063	11	22	0	0	6	0	P_Train	Asteraceae	Brachylaena		http://mediaphoto.mnhn.fr/media/1441358664605Y9CTTT1VX0VQyshM
436954416	P00315229	43	12	0	0	10	0	P_Train	Solanaceae	Solanum	Solanum toliaraea	http://mediaphoto.mnhn.fr/media/1441367688505MvnjfMS330iKEnHc
436954417	P00300058	44	9	0	0	13	0	P_Train	Solanaceae	Solanum	Solanum toliaraea	http://mediaphoto.mnhn.fr/media/1441367195114osRpzKcMSYLmTpeG
436954439	P00229560	8	3	0	0	2	0	P_Train	Asteraceae	Ageratum	Ageratum conyzoides	http://mediaphoto.mnhn.fr/media/1441341732657ApdUjewicCQFC4OD
436954442	P00132086	16	6	0	0	7	1	P_Train	Asteraceae	Ageratum	Ageratum conyzoides	http://mediaphoto.mnhn.fr/media/1441343391744T6VApSbxFaallphk
436954446	P00122888	12	3	0	0	4	0	P_Train	Asteraceae	Ageratum	Ageratum conyzoides	http://mediaphoto.mnhn.fr/media/1441360773806RtWi8sOWdkXLNI6l
436954486	P00548249	51	6	0	0	11	0	P_Train	Apocynaceae	Catharanthus	Catharanthus ovalis	http://mediaphoto.mnhn.fr/media/1441370644734TYOgEgeBbM0PmEav
436954499	P00112802	18	0	3	0	6	0	P_Train	Apocynaceae	Catharanthus	Catharanthus ovalis	http://mediaphoto.mnhn.fr/media/1441370622269l7rLxA5uvR3I8yAc
436954500	P00112817	24	11	0	0	3	0	P_Train	Apocynaceae	Catharanthus	Catharanthus ovalis	http://mediaphoto.mnhn.fr/media/144137062255871sI9GRHoi9J4v3G
436954538	P00048526	14	0	1	0	4	0	P_Train	Burseraceae	Commiphora	Commiphora lamii	http://mediaphoto.mnhn.fr/media/1442347025179oSJhiijI7A5HaKig
436954540	P016278	11	0	9	0	10	0	P_Train	Asteraceae	Vernoniastrum	Vernoniastrum klingii	http://mediaphoto.mnhn.fr/media/1441343533823L9rSuBUNAWYgb4Ed
436954557	P00754891	22	0	3	0	3	0	P_Train	Fabaceae	Baudouinia	Baudouinia fluggeiformis	http://mediaphoto.mnhn.fr/media/1441333349927VgBuRGHFUa5TpflU
436954558	P00754883	22	0	4	0	9	0	P_Train	Fabaceae	Baudouinia	Baudouinia fluggeiformis	http://mediaphoto.mnhn.fr/media/1441333886468ycZZGiB7a8a8RYmq
436954561	P00309824	27	0	6	0	9	0	P_Train	Fabaceae	Baudouinia	Baudouinia fluggeiformis	http://mediaphoto.mnhn.fr/media/1441333862163aeI1klTx4NZDNftn
436954607	P030642	10	22	0	0	12	0	P_Train	Diegodendraceae	Diegodendron	Diegodendron humbertii	http://mediaphoto.mnhn.fr/media/1442328754100hqXt0m7FxRvP4QBf
436954613	P030706	19	8	0	0	5	0	P_Train	Hypericaceae	Psorospermum	Psorospermum nervosum	http://mediaphoto.mnhn.fr/media/1442326374465oq9uOXF455xVaTUH
436954614	P030714	10	12	0	0	6	0	P_Train	Hypericaceae	Psorospermum	Psorospermum sexlineatum	http://mediaphoto.mnhn.fr/media/1442326975609xwttlgUwcvSJ0skE
436954707	P00724570	15	5	0	0	11	0	P_Train	Fabaceae	Strongylodon	Strongylodon madagascariensis	http://mediaphoto.mnhn.fr/media/1441335354853LJtXzp6BZXG8L7PD
436954710	P00149695	16	0	1	0	8	0	P_Train	Fabaceae	Strongylodon	Strongylodon madagascariensis	http://mediaphoto.mnhn.fr/media/1441335664514hNOfboUM6nBStFwZ
436954747	P00333979	10	0	0	0	7	0	P_Train	Fabaceae	Psophocarpus	Psophocarpus scandens	http://mediaphoto.mnhn.fr/media/1441342432343LuvdNPJ55RCQrR9k
436954755	P00100814	11	0	6	0	9	0	P_Train	Fabaceae	Pongamia	Pongamia pinnata	http://mediaphoto.mnhn.fr/media/1441333347286h2vNY06L6WcknlBN
436954757	P00533664	119	0	2	0	21	0	P_Train	Fabaceae	Pongamiopsis	Pongamiopsis pervilleana	http://mediaphoto.mnhn.fr/media/14413333688841sK2vAG4RRbp3zE1
436954783	P00724720	14	0	0	0	2	0	P_Train	Fabaceae	Phylloxylon	Phylloxylon xylophylloides	http://mediaphoto.mnhn.fr/media/1441333303217vBhsB78GVy1tqzsZ
436954865	P033220	13	0	20	0	6	1	P_Train	Asteraceae	Laggera	Laggera crispata	http://mediaphoto.mnhn.fr/media/1441341209922hRDNrMqCvIHlI5TW
436954872	P00117815	15	0	10	0	7	0	P_Train	Asteraceae	Emilia	Emilia baberka	http://mediaphoto.mnhn.fr/media/1441343650745bxdBNJg5jzU225Va
436954956	P00498143	15	0	4	0	6	0	P_Train	Clusiaceae	Garcinia	Garcinia aphanophlebia	http://mediaphoto.mnhn.fr/media/1446815017733YBe6GvEe3V6ZC5lT
436954959	P00498175	8	14	0	0	6	0	P_Train	Calophyllaceae	Calophyllum	Calophyllum chapelieri	http://mediaphoto.mnhn.fr/media/1441418916523zM7txa3sdKnElyTn
436954963	P00498174	10	0	0	0	2	0	P_Train	Calophyllaceae	Calophyllum	Calophyllum chapelieri	http://mediaphoto.mnhn.fr/media/14414189164603KCj6QU4534r8n6o
436955068	P0004865	19	7	0	0	7	0	P_Train	Asteraceae	Othonna	Othonna quinquedentata	http://mediaphoto.mnhn.fr/media/1441342742956Q1vNyTSJWa8VXnhI
436955080	P00533685	21	0	6	0	7	0	P_Train	Fabaceae	Ophrestia	Ophrestia lyallii	http://mediaphoto.mnhn.fr/media/1441334011582WpZ1pIRUwhgRmOED
436955097	P00118387	70	0	8	0	11	0	P_Train	Fabaceae	Mundulea	Mundulea laxiflora	http://mediaphoto.mnhn.fr/media/1441332797289Uf8I8OptLuWI818a
436955171	P00149646	1	0	1	0	1	0	P_Train	Fabaceae	Bauhinia	Bauhinia podopetala	http://mediaphoto.mnhn.fr/media/14413333750492F0BDsFCgPfEFGC6
436955214	P00208837	5	0	8	0	5	0	P_Train	Acanthaceae	Ruellia		http://mediaphoto.mnhn.fr/media/1441359577368qdPBzS11FMxdz03r
436955260	P00273695	14	0	5	0	5	1	P_Train	Asteraceae	Vernoniastrum	Vernoniastrum ugandense	http://mediaphoto.mnhn.fr/media/14413433882085Ok1gGlXJa6hEl3C
436955295	P00554847	4	1	0	0	5	0	P_Train	Malvaceae	Hibiscus	Hibiscus bojerianus	http://mediaphoto.mnhn.fr/media/1441390512507rHyHw9vx9vAUTj7H
436955300	P00554822	15	11	0	0	14	0	P_Train	Malvaceae	Hibiscus	Hibiscus caerulescens	http://mediaphoto.mnhn.fr/media/1441390511094nDM8Atczs336NwLf
436955340	P00123135	10	10	6	0	15	0	P_Train	Asteraceae	Sonchus	Sonchus arvensis	http://mediaphoto.mnhn.fr/media/1441339807139tXzgcQZNgEAsgvaZ
436955541	P00285854	15	14	0	0	13	0	P_Train	Fabaceae	Lonchocarpus	Lonchocarpus sericeus	http://mediaphoto.mnhn.fr/media/1441333821789zUhLFStOt94azmMK
436955562	P00593986	7	9	0	0	10	5	P_Train	Asteraceae	Adenophyllum	Adenophyllum cooperi	http://mediaphoto.mnhn.fr/media/1441343048644aQHkWh3yHR7NgifF
436955565	P00593957	8	38	0	0	18	0	P_Train	Asteraceae	Adenophyllum	Adenophyllum cooperi	http://mediaphoto.mnhn.fr/media/1441343401717hGU486IjaziSu2u3
436955567	P00593947	11	0	0	0	5	1	P_Train	Asteraceae	Adenophyllum	Adenophyllum cooperi	http://mediaphoto.mnhn.fr/media/1441343401529vSjTzbtsJLoCLTmZ
436955586	P00069120	29	0	19	0	12	0	P_Train	Asteraceae	Aspilia	Aspilia bussei	http://mediaphoto.mnhn.fr/media/1446815118758PoykBuTxj8Nmzqc4
436955587	P00069123	25	0	15	0	20	0	P_Train	Asteraceae	Aspilia	Aspilia bussei	http://mediaphoto.mnhn.fr/media/1441343014420S00cpRKOoBglLrn2
436955589	P00533745	16	2	3	0	11	0	P_Train	Fabaceae	Vigna	Vigna unguiculata	http://mediaphoto.mnhn.fr/media/1441333794079nJl3nIPEm4C3npEr
436955604	P00453871	2	0	2	0	4	0	P_Train	Fabaceae	Entada	Entada leptostachya	http://mediaphoto.mnhn.fr/media/1441333173032Rw5NM85uBVv5CloM
436955606	P00453894	44	0	1	0	16	0	P_Train	Fabaceae	Entada	Entada leptostachya	http://mediaphoto.mnhn.fr/media/1441333194603xifEzpuyFSYsVWOc
436955618	P00139922	15	0	4	0	4	0	P_Train	Fabaceae	Senna	Senna septemtrionalis	http://mediaphoto.mnhn.fr/media/14413341209505qOG4tKmLgGMCuE8
436955619	P00139921	4	12	4	0	12	0	P_Train	Fabaceae	Senna	Senna septemtrionalis	http://mediaphoto.mnhn.fr/media/14413424069912qPtPZ4aLHa0xs6h
436955622	P00189063	13	1	0	0	6	0	P_Train	Fabaceae	Senna	Senna septemtrionalis	http://mediaphoto.mnhn.fr/media/1441335598607qHziEjaNWyCdrX4P
436955624	P00189070	18	3	1	0	7	0	P_Train	Fabaceae	Senna	Senna septemtrionalis	http://mediaphoto.mnhn.fr/media/1441335598746xs7mSa9CMfAiOl9h
436955630	P00139915	29	2	6	0	9	0	P_Train	Fabaceae	Senna	Senna septemtrionalis	http://mediaphoto.mnhn.fr/media/1441334120840BYNydlp9tFB3uHMG
436955638	P00156405	29	20	4	0	15	0	P_Train	Fabaceae	Senna	Senna viguierella	http://mediaphoto.mnhn.fr/media/1441333311220i2SJbZwXQH7XYz45
436955642	P00156406	46	11	0	0	11	0	P_Train	Fabaceae	Senna	Senna viguierella	http://mediaphoto.mnhn.fr/media/1441333311239bwnF4oD7XUUpnu3c
436955643	P00156392	44	25	0	0	22	0	P_Train	Fabaceae	Senna	Senna viguierella	http://mediaphoto.mnhn.fr/media/1441333310984Qv99EBRcv6ExeRy3
436955724	P00187827	25	15	0	0	12	0	P_Train	Fabaceae	Senna	Senna obtusifolia	http://mediaphoto.mnhn.fr/media/14413333129267IZpiTJqGiVo6dt2
436955725	P00187826	13	1	6	0	4	0	P_Train	Fabaceae	Senna	Senna obtusifolia	http://mediaphoto.mnhn.fr/media/1441333312903JTJKwAdvn395SHx9
436955727	P00187787	19	5	0	0	4	0	P_Train	Fabaceae	Senna	Senna obtusifolia	http://mediaphoto.mnhn.fr/media/1441333312711CAZAwlVUgyF1Ewsr
436955728	P00187785	18	2	2	0	4	0	P_Train	Fabaceae	Senna	Senna obtusifolia	http://mediaphoto.mnhn.fr/media/1441333312675utN71Zqder9H6CMB
436955729	P00156637	18	0	4	0	6	0	P_Train	Fabaceae	Senna	Senna obtusifolia	http://mediaphoto.mnhn.fr/media/14413423267635hvREYD1tC8c9Ize
436955736	P00046695	13	4	0	0	8	0	P_Train	Malvaceae	Byttneria	Byttneria macrantha	http://mediaphoto.mnhn.fr/media/1442320852653FIIIcCKCUaU9uAu7
436955748	P00554534	4	1	0	0	3	0	P_Train	Malvaceae	Hibiscus	Hibiscus lasiococcus	http://mediaphoto.mnhn.fr/media/14413904621032F5DmSUR1sMa9GHa
436955759	P00554502	10	4	0	0	8	0	P_Train	Malvaceae	Hibiscus	Hibiscus liliastrum	http://mediaphoto.mnhn.fr/media/1441390461583pZeLcMwU7TP33zLx
436955760	P00574661	3	9	0	0	3	0	P_Train	Malvaceae	Hibiscus	Hibiscus macrogonus	http://mediaphoto.mnhn.fr/media/14413905136700lqx8tqjE7rVsVm0
436955761	P00574658	6	3	0	0	6	0	P_Train	Malvaceae	Hibiscus	Hibiscus macrogonus	http://mediaphoto.mnhn.fr/media/14413905136522vRoxPaLtM5tpSlV
436955763	P00554438	12	14	0	0	7	0	P_Train	Malvaceae	Hibiscus	Hibiscus macrogonus	http://mediaphoto.mnhn.fr/media/1441390461150LmGqymydXxG8vcOz
436955765	P00554423	3	6	0	0	2	0	P_Train	Malvaceae	Hibiscus	Hibiscus mandrarensis	http://mediaphoto.mnhn.fr/media/1441390414367yEzSpHDVrM5amPMe
436955766	P00692853	24	6	0	0	6	0	P_Train	Malvaceae	Hibiscus	Hibiscus mandrarensis	http://mediaphoto.mnhn.fr/media/144139008105715QNt6cAcpEXXc3E
436955770	P00554421	15	7	0	0	5	0	P_Train	Malvaceae	Hibiscus	Hibiscus mandrarensis	http://mediaphoto.mnhn.fr/media/14413904142333txZzd0qeRJU3fKo
436955771	P00554422	18	2	0	0	4	0	P_Train	Malvaceae	Hibiscus	Hibiscus mandrarensis	http://mediaphoto.mnhn.fr/media/1441390414279P0ig7n5MtRz0L49a
436955772	P030983	42	9	0	0	5	0	P_Train	Malvaceae	Hibiscus	Hibiscus mandrarensis	http://mediaphoto.mnhn.fr/media/1442333695325ilopMJ2mRx9dDkxX
436955781	P00560258	24	11	0	0	14	0	P_Train	Malvaceae	Hibiscus	Hibiscus micranthus	http://mediaphoto.mnhn.fr/media/1441390080690uyRkPFbBXemsezmd
436955796	P00560109	50	2	0	0	12	0	P_Train	Malvaceae	Hibiscus	Hibiscus perrieri	http://mediaphoto.mnhn.fr/media/1441389598625aRG4F4QNREqFj3jw
436956241	P00176695	8	0	2	1	5	0	P_Train	Fabaceae	Bauhinia		http://mediaphoto.mnhn.fr/media/1441450728143FRXnZ4msPKwLvq0E
436956269	P00131803	54	0	9	0	13	0	P_Train	Fabaceae	Senna	Senna anthoxantha	http://mediaphoto.mnhn.fr/media/1442336737581BBPII0aoAbOR9lUn
436956292	P00100481	10	0	2	0	6	0	P_Train	Fabaceae	Erythrophleum	Erythrophleum couminga	http://mediaphoto.mnhn.fr/media/1441333192913PGhDlf1LPFEfNr4A
436956323	P00643092	10	7	0	0	10	0	P_Train	Malvaceae	Hibiscus		http://mediaphoto.mnhn.fr/media/1453205559015OtovCiewAEBRgjzk
436956336	P025071	20	0	3	0	9	0	P_Train	Burseraceae	Commiphora	Commiphora tetramera	http://mediaphoto.mnhn.fr/media/1441394602695slh6uqNbTptFrVry
436956348	P00376332	2	5	0	0	2	1	P_Train	Orchidaceae	Eulophia		http://mediaphoto.mnhn.fr/media/1441306414556g9rDUhSgiQEQfaKN
436956360	P00497845	27	0	3	2	11	0	P_Train	Loganiaceae	Strychnos	Strychnos madagascariensis	http://mediaphoto.mnhn.fr/media/1441373427952O73rIhwFbMo84Egs
436956361	P00497852	10	0	0	0	4	0	P_Train	Loganiaceae	Strychnos	Strychnos madagascariensis	http://mediaphoto.mnhn.fr/media/1441371320839RRoVjSg3vUuKut3V
436956366	P030548	7	1	0	0	8	0	P_Train	Capparaceae	Crateva	Crateva excelsa	http://mediaphoto.mnhn.fr/media/14413416402430RsxRLGJpnLxQXSW
436956367	P00591725	3	8	0	0	3	0	P_Train	Rubiaceae	Psychotria		http://mediaphoto.mnhn.fr/media/1441384518544ULltUrIZbBxN7t8a
436956369	P00354253	7	0	2	0	1	0	P_Train	Rubiaceae	Psychotria		http://mediaphoto.mnhn.fr/media/1441378458584mR75WFZI7xaljG39
436956378	P00752159	11	3	0	0	7	0	P_Train	Rubiaceae	Psychotria		http://mediaphoto.mnhn.fr/media/1504888796229obKgqc0SXHkKC4Ec
436956379	P00752155	9	8	0	0	4	0	P_Train	Rubiaceae	Psychotria		http://mediaphoto.mnhn.fr/media/1504888793641Ibn7k67nv3NxBg2P
436956382	P00752008	14	26	0	0	11	0	P_Train	Rubiaceae	Psychotria		http://mediaphoto.mnhn.fr/media/1441378459282RTZ0oHH7faLH74kM
436956383	P00752004	39	0	2	0	12	0	P_Train	Rubiaceae	Psychotria		http://mediaphoto.mnhn.fr/media/1441378459264jQ4YaA8OjBULl6Vc
436956384	P00751991	17	2	7	0	5	0	P_Train	Rubiaceae	Psychotria		http://mediaphoto.mnhn.fr/media/1504889009218saTIRFaPel6hlhER
436956394	P00630512	4	8	0	0	2	0	P_Train	Rubiaceae	Psychotria		http://mediaphoto.mnhn.fr/media/1441372117407iyGtVMZoaJK9Y9l4
436956395	P00591982	10	6	0	0	3	0	P_Train	Rubiaceae	Psychotria		http://mediaphoto.mnhn.fr/media/1453217720647BOSPEE3zmTB3XWHv
436956400	P00591750	4	0	13	0	2	0	P_Train	Rubiaceae	Psychotria		http://mediaphoto.mnhn.fr/media/1441378757791rmIvSQ2CIq5Dd5zG
436956401	P00591681	6	0	1	0	2	0	P_Train	Rubiaceae	Psychotria		http://mediaphoto.mnhn.fr/media/1441378458865mpbhzyKWPNiIguP7
436956402	P00591674	4	5	0	0	4	0	P_Train	Rubiaceae	Psychotria		http://mediaphoto.mnhn.fr/media/1441378458845JRk56VGSxwZ8KvGc
436956404	P00592515	9	0	17	0	6	0	P_Train	Rubiaceae	Psychotria		http://mediaphoto.mnhn.fr/media/1441378711276vNF5XfI5RLEk2wGJ
436956405	P00592432	2	0	7	0	3	0	P_Train	Rubiaceae	Psychotria		http://mediaphoto.mnhn.fr/media/1441378758033eZdiRiWAOczClcmX
436956406	P00592388	4	0	24	0	2	0	P_Train	Rubiaceae	Psychotria		http://mediaphoto.mnhn.fr/media/1441383442624aG6k2H9ETYpoU79K
436956407	P00592354	4	2	2	0	2	0	P_Train	Rubiaceae	Psychotria		http://mediaphoto.mnhn.fr/media/1441386271695HoaAQo9B8Mu66Gvd
436956410	P00592092	8	0	1	0	2	0	P_Train	Rubiaceae	Psychotria		http://mediaphoto.mnhn.fr/media/1453217634046be8WDcRQTiJFtRpY
436956411	P00527337	10	0	8	0	5	0	P_Train	Rubiaceae	Psychotria		http://mediaphoto.mnhn.fr/media/1441339962766yR6vTnKuCJPXKVnd
436956414	P00354863	2	7	0	0	2	0	P_Train	Rubiaceae	Psychotria		http://mediaphoto.mnhn.fr/media/1441380627987Txwv72EVYoo32sFL
436956416	P00354395	21	0	2	0	8	0	P_Train	Rubiaceae	Psychotria		http://mediaphoto.mnhn.fr/media/1441382201811mN0JN9jDN1nVHMUq
436956419	P00217285	8	0	4	0	2	0	P_Train	Rubiaceae	Psychotria		http://mediaphoto.mnhn.fr/media/1504888765618ZqoASWHGwUF5n3mu
436956420	P00217284	4	0	27	0	3	0	P_Train	Rubiaceae	Psychotria		http://mediaphoto.mnhn.fr/media/1441384518436HN77h2yhtVIQGRG5
436956421	P00239546	5	0	2	0	2	0	P_Train	Rubiaceae	Psychotria		http://mediaphoto.mnhn.fr/media/144138293930194q6EKpGyvGCELfC
436956422	P00239404	21	0	3	0	6	0	P_Train	Rubiaceae	Psychotria		http://mediaphoto.mnhn.fr/media/1441378428468f8HjTViSoG3rT8KX
436956423	P00209410	11	0	6	0	4	0	P_Train	Rubiaceae	Psychotria		http://mediaphoto.mnhn.fr/media/144133995997991xSSoKzdSVyjErZ
436956425	P00176702	6	0	2	0	3	0	P_Train	Rubiaceae	Psychotria		http://mediaphoto.mnhn.fr/media/1441388021997iM4D1WZu5q0KXlLp
436956438	P00591732	18	12	0	0	4	0	P_Train	Rubiaceae	Tarenna		http://mediaphoto.mnhn.fr/media/1441381530325Hqo9zya2ULGYdBqv
436956439	P00592424	2	13	0	0	0	0	P_Train	Rubiaceae	Tarenna		http://mediaphoto.mnhn.fr/media/1441378757988Chwo2auz5VFlA5Lf
436956440	P00533643	26	2	2	0	14	0	P_Train	Rubiaceae	Tarenna		http://mediaphoto.mnhn.fr/media/1441381682047360cM6eq3Y0kpSFa
436956445	P00239407	14	4	0	0	4	0	P_Train	Rubiaceae	Tarenna		http://mediaphoto.mnhn.fr/media/1441375384198qqLfB2KUPj4SpXfB
436956483	P00074939	12	0	3	0	3	0	P_Train	Fabaceae	Pterocarpus	Pterocarpus marsupium	http://mediaphoto.mnhn.fr/media/1441330332342Vd6WhWJUIA1kQrKb
436956488	P00481043	12	0	1	0	11	0	P_Train	Sarcolaenaceae	Sarcolaena	Sarcolaena grandiflora	http://mediaphoto.mnhn.fr/media/1441391664748OL5FgzoDqMSIplw0
436956496	P00724770	19	6	0	0	14	0	P_Train	Sarcolaenaceae	Sarcolaena	Sarcolaena delphinensis	http://mediaphoto.mnhn.fr/media/1441391722882SkImh2FMhTCtU30R
436956497	P00692373	8	0	5	0	10	0	P_Train	Sarcolaenaceae	Sarcolaena	Sarcolaena multiflora	http://mediaphoto.mnhn.fr/media/1441387257597kjBtf1XbxmGgoPBf
436956499	P00480993	11	0	15	0	7	0	P_Train	Sarcolaenaceae	Sarcolaena	Sarcolaena multiflora	http://mediaphoto.mnhn.fr/media/1441387212305VhvBzAdLt8LE89dh
436956504	P00490945	9	0	5	0	3	0	P_Train	Sarcolaenaceae	Sarcolaena	Sarcolaena multiflora	http://mediaphoto.mnhn.fr/media/1441387259350dTP2SDHr4ymLrjWz
436956506	P00480957	5	0	7	0	3	0	P_Train	Sarcolaenaceae	Sarcolaena	Sarcolaena multiflora	http://mediaphoto.mnhn.fr/media/1441387190411SOJCQrLZgPM6Qhnr
436956508	P00480969	3	0	1	0	2	0	P_Train	Sarcolaenaceae	Sarcolaena	Sarcolaena multiflora	http://mediaphoto.mnhn.fr/media/1441387190691bsOR2EcppGaOKBiB
436956509	P00480973	8	0	1	0	7	0	P_Train	Sarcolaenaceae	Sarcolaena	Sarcolaena multiflora	http://mediaphoto.mnhn.fr/media/14413871907885NTwOtr4OniLiC4O
436956513	P00481017	7	0	15	0	5	0	P_Train	Sarcolaenaceae	Sarcolaena	Sarcolaena multiflora	http://mediaphoto.mnhn.fr/media/1441387212623cbocZALgievig3N6
436956876	P00183967	51	0	3	0	9	0	P_Train	Fabaceae	Indigofera	Indigofera hirsuta	http://mediaphoto.mnhn.fr/media/1441342405514AVTPVFssQKxoU9Qe
436956942	P00144625	10	0	2	0	2	0	P_Train	Phyllanthaceae	Wielandia	Wielandia elegans	http://mediaphoto.mnhn.fr/media/1441341114204ULofWo1ve2PIWilq
436956943	P00144624	14	0	3	0	4	0	P_Train	Phyllanthaceae	Wielandia	Wielandia elegans	http://mediaphoto.mnhn.fr/media/1441341114186JYl2PhO7RKiOVpgh
436957062	P00577927	12	12	0	0	12	0	P_Train	Lamiaceae	Clerodendrum		http://mediaphoto.mnhn.fr/media/1441453473170u5ipRbdLjcJwiKKD
436957200	P00692564	2	0	3	0	4	0	P_Train	Fabaceae	Dioclea	Dioclea wilsonii	http://mediaphoto.mnhn.fr/media/1441334058653IH1XADib4SZG5KVk
436957219	P00309781	6	2	0	0	5	0	P_Train	Fabaceae	Desmodium	Desmodium dolabriforme	http://mediaphoto.mnhn.fr/media/1441334059548Wh7Iqe4wJ4ARGnR8
436957270	P00692415	10	0	3	0	5	0	P_Train	Sphaerosepalaceae	Rhopalocarpus	Rhopalocarpus lucidus	http://mediaphoto.mnhn.fr/media/144138999352699akkIQgHPXaRR6e
436957286	P00481103	11	0	6	0	10	0	P_Train	Sphaerosepalaceae	Rhopalocarpus	Rhopalocarpus lucidus	http://mediaphoto.mnhn.fr/media/1441389915157FUxmQvTicHzLSO35
436957551	P00298996	13	4	0	0	6	0	P_Train	Solanaceae	Physalis	Physalis peruviana	http://mediaphoto.mnhn.fr/media/14413677218261nzXMLNmJiS88usg
436957568	P00352242	8	6	0	0	5	0	P_Train	Solanaceae	Physalis	Physalis peruviana	http://mediaphoto.mnhn.fr/media/1441365624835FuNncF7BHgjigWBk
436957613	P00062077	4	0	7	0	1	0	P_Train	Anacardiaceae	Semecarpus	Semecarpus neocaledonica	http://mediaphoto.mnhn.fr/media/1442719886683kbl6cuCfBRZpUO2g
436957765	P00055785	27	0	5	0	9	0	P_Train	Solanaceae	Solanum	Solanum americanum	http://mediaphoto.mnhn.fr/media/1441364078737EQKLZNKNFNlxBxDx
436957890	P00325608	6	0	0	0	4	0	P_Train	Solanaceae	Solanum	Solanum coriaceum	http://mediaphoto.mnhn.fr/media/1441369461507SaNmsuB1qk8c2xbA
436957892	P00325603	9	0	0	0	6	0	P_Train	Solanaceae	Solanum	Solanum coriaceum	http://mediaphoto.mnhn.fr/media/144136946141076VnMixXlnwbKcYQ
436958043	P00340737	13	3	0	0	5	0	P_Train	Vitaceae	Cissus	Cissus floribunda	http://mediaphoto.mnhn.fr/media/1441328320768bs3VpSIaGo6r1T0b
436958045	P00061302	10	4	0	0	8	0	P_Train	Vitaceae	Cissus	Cissus lemuricus	http://mediaphoto.mnhn.fr/media/1445764429517m426U4siMh0spiua
436958051	P00039977	17	33	0	0	10	0	P_Train	Malvaceae	Dombeya	Dombeya decaryana	http://mediaphoto.mnhn.fr/media/14423149381451bzGgr7Hgor8gnTX
436958052	P00039980	9	6	0	0	7	0	P_Train	Malvaceae	Dombeya	Dombeya delilei	http://mediaphoto.mnhn.fr/media/14423149853931KEexkgv7p4ey88Z
436958436	P00144670	10	11	0	0	4	0	P_Train	Vitaceae	Leea	Leea guineensis	http://mediaphoto.mnhn.fr/media/1441453233655o277OHyWKHRqVqud
436958439	P00216162	23	32	0	0	8	0	P_Train	Rhamnaceae	Ziziphus	Ziziphus spina-christi	http://mediaphoto.mnhn.fr/media/1441340040789W0f4x2KMcda07vbp
436958447	P00213993	7	1	0	0	2	0	P_Train	Rhamnaceae	Colubrina	Colubrina decipiens	http://mediaphoto.mnhn.fr/media/1441340040491R3LNt2JuElKzWkgr
436958511	P00044932	8	19	0	0	3	0	P_Train	Malvaceae	Dombeya	Dombeya punctatopsis	http://mediaphoto.mnhn.fr/media/1442315453331L5AvgAOGjWRR3yuG
436958542	P00156487	12	9	0	0	6	0	P_Train	Rubiaceae	Carphalea	Carphalea madagascariensis	http://mediaphoto.mnhn.fr/media/144137508973483Ohme0lGuRHTvM2
436958572	P00433285	12	3	0	0	4	0	P_Train	Euphorbiaceae	Croton	Croton trichotomus	http://mediaphoto.mnhn.fr/media/14414411723057A9aouus6SFkPG21
436958592	P00054143	9	0	12	0	4	0	P_Train	Solanaceae	Solanum	Solanum spirale	http://mediaphoto.mnhn.fr/media/1443486376212kPR0z2h4SIlFqB88
436958600	P00352300	6	4	0	0	3	0	P_Train	Solanaceae	Solanum	Solanum torvum	http://mediaphoto.mnhn.fr/media/1441365601131ZVv4eHM6hDLffQZH
436958601	P00054189	8	7	0	0	1	0	P_Train	Solanaceae	Solanum	Solanum torvum	http://mediaphoto.mnhn.fr/media/14413640793606mGnl6xUUwymYy4d
436958611	P00384426	2	1	0	0	2	0	P_Train	Solanaceae	Solanum	Solanum torvum	http://mediaphoto.mnhn.fr/media/144136633407823IYukvFyJs9X7Vv
436958630	P00054232	5	9	0	0	5	0	P_Train	Solanaceae	Solanum	Solanum torvum	http://mediaphoto.mnhn.fr/media/1441364080194OxMjA5zWtpUSe71o
436958633	P00054202	5	2	6	0	4	0	P_Train	Solanaceae	Solanum	Solanum torvum	http://mediaphoto.mnhn.fr/media/1441364079606cMz9289rJ8niL7bQ
436958636	P00054164	9	8	6	0	6	0	P_Train	Solanaceae	Solanum	Solanum torvum	http://mediaphoto.mnhn.fr/media/14413640583518wi3BAoDcBlPiBM0
436958660	P00209625	6	16	8	0	9	0	P_Train	Rubiaceae	Paederia	Paederia bojeriana	http://mediaphoto.mnhn.fr/media/1441340173633UiRUkZkTgrmx4cF4
436958687	P00161700	13	4	0	0	5	0	P_Train	Pentadiplandraceae	Pentadiplandra	Pentadiplandra brazzeana	http://mediaphoto.mnhn.fr/media/1441389258209lYWYgsQaGrioq1JM
436958692	P00161668	9	7	0	0	4	0	P_Train	Pentadiplandraceae	Pentadiplandra	Pentadiplandra brazzeana	http://mediaphoto.mnhn.fr/media/1441389257586DhpxCf72TjmjNfbs
436958698	P00061516	4	2	0	0	2	0	P_Train	Melastomataceae	Medinilla	Medinilla angustifolia	http://mediaphoto.mnhn.fr/media/1442343479229YH4EQqAdfUZsmuZi
436958734	P00060420	4	2	0	0	0	0	P_Train	Melastomataceae	Medinilla	Medinilla calcicrassa	http://mediaphoto.mnhn.fr/media/14424534407520B1fD7LW0pHKlvk1
436958736	P00060453	12	10	0	0	11	0	P_Train	Melastomataceae	Medinilla	Medinilla rubrinervia	http://mediaphoto.mnhn.fr/media/1441395115073VCcB8iesdaAWHHRQ
436958810	P00046575	7	2	0	0	4	0	P_Train	Malvaceae	Dombeya	Dombeya viburnifloropsis	http://mediaphoto.mnhn.fr/media/1442320623681edMazOhUB7Rtmtl8
436958833	P00093410	9	1	0	0	4	0	P_Train	Malvaceae	Helmiopsiella	Helmiopsiella leandrii	http://mediaphoto.mnhn.fr/media/1442320650727E3vKhIFndhGtmJLf
436958922	P00384892	2	8	0	0	5	0	P_Train	Solanaceae	Solanum	Solanum wendlandii	http://mediaphoto.mnhn.fr/media/1441371494676WBLwsltfPTsy2D0P
436958939	P00144168	8	0	22	0	7	0	P_Train	Monimiaceae	Hedycarya	Hedycarya parvifolia	http://mediaphoto.mnhn.fr/media/1441303774539IyjoKOh5nkN2wKgn
436958944	P00144122	20	0	5	0	6	0	P_Train	Monimiaceae	Hedycarya	Hedycarya parvifolia	http://mediaphoto.mnhn.fr/media/1441303201908ZZPTgMDA3LUcMmBX
436958950	P00309931	30	6	0	0	8	0	P_Train	Apocynaceae	Cynanchum	Cynanchum phillipsonianum	http://mediaphoto.mnhn.fr/media/1441370128013YemB6zyok55KMRbw
436958956	P00684873	19	19	0	0	6	0	P_Train	Celastraceae	Mystroxylon	Mystroxylon aethiopicum	http://mediaphoto.mnhn.fr/media/1441340222160iQ9YjaZZKTqd7RCL
436958957	P00527380	11	0	3	0	6	0	P_Train	Celastraceae	Mystroxylon	Mystroxylon aethiopicum	http://mediaphoto.mnhn.fr/media/144134010632052vEEStNSXXi83Ao
436958963	P00056192	2	10	0	0	5	0	P_Train	Apocynaceae	Nerium		http://mediaphoto.mnhn.fr/media/144137953291921vIwq2ueXxhQnYb
436959003	P00389395	11	4	0	0	9	0	P_Train	Malvaceae	Macrostelia	Macrostelia laurina	http://mediaphoto.mnhn.fr/media/1442333990613nOxeCmlBjKNp9UYC
436959004	P00037131	4	1	0	0	3	0	P_Train	Malvaceae	Macrostelia	Macrostelia laurina	http://mediaphoto.mnhn.fr/media/1442333988204mhEd64nFKiaPCGEB
436959052	P00530438	36	0	4	0	15	0	P_Train	Betulaceae	Betula	Betula pendula	http://mediaphoto.mnhn.fr/media/1441445337623nNzuBD9SuK5wP0gZ
436959339	P00196602	30	15	0	0	15	1	P_Train	Linderniaceae	Bonnaya	Bonnaya antipoda	http://mediaphoto.mnhn.fr/media/1441341774612VM4zPCZWNzBj7gIO
436959346	P00055926	7	2	0	0	4	0	P_Train	Solanaceae	Solanum	Solanum camranhense	http://mediaphoto.mnhn.fr/media/1441364059636OxMNTgQv1ocA91mV
436959613	P016921	6	22	0	0	8	0	P_Train	Melastomataceae	Tibouchina	Tibouchina urceolaris	http://mediaphoto.mnhn.fr/media/1441396896173NthlqJCfgLzngyGf
436959720	P00053133	11	11	0	0	5	0	P_Train	Atherospermataceae	Daphnandra	Daphnandra repandula	http://mediaphoto.mnhn.fr/media/1441304777216ncyNwtdxVUmr4Q3h
436959738	P00054082	21	2	0	0	6	0	P_Train	Solanaceae	Solanum	Solanum nienkui	http://mediaphoto.mnhn.fr/media/1441364035781l9xxWfHtiu34Bm3p
436959739	P00054078	17	4	0	0	11	0	P_Train	Solanaceae	Solanum	Solanum nienkui	http://mediaphoto.mnhn.fr/media/1441364058025lloq2tWy0fSzRLcT
436959740	P00054077	28	11	0	0	17	0	P_Train	Solanaceae	Solanum	Solanum nienkui	http://mediaphoto.mnhn.fr/media/1441364058003h45zV0W0wsa4tKCW
436959756	P00533713	8	22	0	0	6	1	P_Train	Orchidaceae	Habenaria		http://mediaphoto.mnhn.fr/media/1441306721752utGiGw0SuVXfVkXS
436959862	P00039968	20	23	0	0	12	0	P_Train	Malvaceae	Dombeya	Dombeya merika	http://mediaphoto.mnhn.fr/media/1442314718971VVd3EWkUwTaCvryq
436959966	P02088035	7	30	0	0	9	0	P_Train	Sphaerosepalaceae	Rhopalocarpus	Rhopalocarpus coriaceus	http://mediaphoto.mnhn.fr/media/1441390015589yurhSduDGgtdaaWN
436959973	P00751202	17	0	5	0	5	0	P_Train	Sphaerosepalaceae	Rhopalocarpus	Rhopalocarpus longipetiolatus	http://mediaphoto.mnhn.fr/media/1441431133134kfMUq46hEb07O2To
436959980	P00692517	7	0	3	0	3	0	P_Train	Sphaerosepalaceae	Rhopalocarpus	Rhopalocarpus triplinervius	http://mediaphoto.mnhn.fr/media/14413899415655gBOZ4JsLkFOlpzY
436959982	P00692513	9	0	0	0	6	0	P_Train	Sphaerosepalaceae	Rhopalocarpus	Rhopalocarpus undulatus	http://mediaphoto.mnhn.fr/media/14413900152485YL6fRBOvF4X5Zzb
436959983	P00751200	15	0	3	0	10	0	P_Train	Sphaerosepalaceae	Rhopalocarpus	Rhopalocarpus undulatus	http://mediaphoto.mnhn.fr/media/1441431133090luPv85qyrW5Vtxma
436959988	P00047917	3	0	4	0	2	0	P_Train	Lecythidaceae	Rhaptopetalum	Rhaptopetalum pachyphyllum	http://mediaphoto.mnhn.fr/media/1442325249042We7zPlqTUuaajIAb
436960004	P00053310	4	4	1	0	6	0	P_Train	Siparunaceae	Siparuna	Siparuna guianensis	http://mediaphoto.mnhn.fr/media/1418908228701nE9GMKMjLrs3ufuV
436960005	P00052944	8	0	0	0	9	0	P_Train	Siparunaceae	Siparuna	Siparuna poeppigii	http://mediaphoto.mnhn.fr/media/1418908150149A5AEb3LjFJp9CJdY
436960006	P00060096	7	0	6	0	5	0	P_Train	Siparunaceae	Siparuna	Siparuna poeppigii	http://mediaphoto.mnhn.fr/media/14189082548509nhNoVXgAUnazAxm
436960007	P00053086	4	0	0	0	3	0	P_Train	Siparunaceae	Siparuna	Siparuna poeppigii	http://mediaphoto.mnhn.fr/media/1418908174459cai3MZq4yJhXGjZj
436960008	P00053085	11	0	1	0	4	0	P_Train	Siparunaceae	Siparuna	Siparuna poeppigii	http://mediaphoto.mnhn.fr/media/1418908172737a7xk7BcdnUAPNIkz
436960036	P00221302	5	3	0	0	3	0	P_Train	Rubiaceae	Razafimandimbisonia	Razafimandimbisonia humblotii	http://mediaphoto.mnhn.fr/media/1441373825096kzdsHSUM9cECmFk6
436960044	P00151063	22	0	8	0	8	0	P_Train	Ebenaceae	Diospyros	Diospyros flavocarpa	http://mediaphoto.mnhn.fr/media/1441382424213hsSZIG0KFRQiIOuC
436960059	P00151572	8	10	0	0	6	0	P_Train	Ebenaceae	Diospyros	Diospyros parviflora	http://mediaphoto.mnhn.fr/media/1441379104350WG5hqd5Ji2Ny3ozh
436960067	P00154023	11	0	6	0	5	0	P_Train	Ebenaceae	Diospyros	Diospyros tireliae	http://mediaphoto.mnhn.fr/media/1441379901107zbR9hAsmd2R5GN8N
436960116	P00224909	13	3	0	0	9	0	P_Train	Brassicaceae	Alliaria	Alliaria petiolata	http://mediaphoto.mnhn.fr/media/1441384877727dJraf5ZT8BS5sS1n
436960144	P00501968	2	14	0	0	4	0	P_Train	Malvaceae	Helicteropsis	Helicteropsis microsiphon	http://mediaphoto.mnhn.fr/media/1441389618621WaNO0zUsOl6VQr9Q
436960145	P00569602	34	28	0	0	24	0	P_Train	Malvaceae	Abutilon	Abutilon angulatum	http://mediaphoto.mnhn.fr/media/1441389348316Vgk5PcqZwu4fwX9E
436960146	P00569608	42	8	0	0	20	0	P_Train	Malvaceae	Abutilon	Abutilon angulatum	http://mediaphoto.mnhn.fr/media/144138934852174MdrYTBoa7TSqkS
436960149	P00569590	16	6	0	0	10	0	P_Train	Malvaceae	Abutilon	Abutilon indicum	http://mediaphoto.mnhn.fr/media/1441389750980DldbW6lnUyGbSecu
436960152	P00213562	26	30	0	0	28	0	P_Train	Malvaceae	Abutilon	Abutilon indicum	http://mediaphoto.mnhn.fr/media/15004554825740XKpDOG4TupFXy0J
436960153	P00037144	12	12	0	0	4	0	P_Train	Malvaceae	Abutilon	Abutilon indicum	http://mediaphoto.mnhn.fr/media/1500455478193ADiHD93WIaQmup29
436960157	P00574614	12	11	0	0	10	0	P_Train	Malvaceae	Sida	Sida urens	http://mediaphoto.mnhn.fr/media/1441389775908xCLyt1VbuR8HP9QX
436960158	P00574610	29	33	0	0	24	0	P_Train	Malvaceae	Sida	Sida urens	http://mediaphoto.mnhn.fr/media/144138977582957EjLHTOOg4hexIg
436960168	P00724922	37	24	0	0	16	0	P_Train	Malvaceae	Sida	Sida acuta	http://mediaphoto.mnhn.fr/media/1441430891076XPCsVuClrhsFWOa9
436960180	P00574526	42	13	0	0	15	1	P_Train	Malvaceae	Sida	Sida rhombifolia	http://mediaphoto.mnhn.fr/media/1441389751574IqmNQM4HIpnq5bkX
436960200	P00684857	8	3	0	0	3	0	P_Train	Malvaceae	Adansonia	Adansonia digitata	http://mediaphoto.mnhn.fr/media/1441341715163GUXDqvp5KWTT86qO
436960204	P00246061	0	3	0	0	0	0	P_Train	Malvaceae	Adansonia	Adansonia digitata	http://mediaphoto.mnhn.fr/media/1441341732853HnYIEvmBPWR8eoSx
436960207	P00403061	21	1	0	0	3	0	P_Train	Malvaceae	Adansonia	Adansonia rubrostipa	http://mediaphoto.mnhn.fr/media/1441389770582LZHWx4whzvnOKyFm
436960542	P00047982	39	0	0	0	5	0	P_Train	Erythroxylaceae	Erythroxylum	Erythroxylum mocquerysii	http://mediaphoto.mnhn.fr/media/1441438506333jY8thHkPDZrwcIgj
436960543	P00213746	6	0	1	0	2	0	P_Train	Erythroxylaceae	Erythroxylum	Erythroxylum nossibeense	http://mediaphoto.mnhn.fr/media/1441340039418rOsbKl6vVjmpXfip
436960562	P00048043	14	11	0	0	8	0	P_Train	Malpighiaceae	Sphedamnocarpus	Sphedamnocarpus humbertii	http://mediaphoto.mnhn.fr/media/1442341726492IwhWiQxmMLT9jUaQ
436960641	P00037239	8	3	0	0	2	0	P_Train	Malvaceae	Nesogordonia	Nesogordonia crassipes	http://mediaphoto.mnhn.fr/media/1442304265536StMKuTIXs9B9EV2e
436960683	P00390074	16	8	0	0	5	0	P_Train	Combretaceae	Combretum	Combretum subumbellatum	http://mediaphoto.mnhn.fr/media/1442337970097Og1eYD2Ei4AivPjb
436960684	P00048131	6	7	4	1	4	0	P_Train	Combretaceae	Combretum	Combretum subumbellatum	http://mediaphoto.mnhn.fr/media/1442337935078B9WHYuV0lGeraSfW
436960685	P02284458	6	3	0	0	5	0	P_Train	Combretaceae	Combretum	Combretum macrocalyx	http://mediaphoto.mnhn.fr/media/1441452879375sdMD3MWR9NDLyaHL
436960717	P00413967	23	3	0	0	5	0	P_Train	Malvaceae	Adansonia	Adansonia madagascariensis	http://mediaphoto.mnhn.fr/media/1441389794995QbCmv1QTSKUgSUyB
436960723	P00413972	0	4	0	0	0	0	P_Train	Malvaceae	Adansonia	Adansonia madagascariensis	http://mediaphoto.mnhn.fr/media/14413897951177cPwvQ0i4SYPLmOW
436960734	P00413734	6	1	0	0	1	0	P_Train	Malvaceae	Adansonia	Adansonia za	http://mediaphoto.mnhn.fr/media/1441389876451gUxHNsZWwsU3psjt
436960777	P00068989	0	27	0	0	7	0	P_Train	Cyperaceae	Schoenoplectus	Schoenoplectus lacustris	http://mediaphoto.mnhn.fr/media/14413142603828Mf23zaNnn5XMG4M
436960842	P00038435	3	22	0	0	3	0	P_Train	Polygalaceae	Xanthophyllum	Xanthophyllum cochinchinense	http://mediaphoto.mnhn.fr/media/1441339132877zlhgGiK7s4FWCxGb
436960951	P00048175	14	12	0	0	10	0	P_Train	Malpighiaceae	Microsteira	Microsteira firingalavae	http://mediaphoto.mnhn.fr/media/1442331548204RCgFp8ims8mUnlKw
436960965	P00048656	11	13	0	0	5	0	P_Train	Amaranthaceae	Amaranthus	Amaranthus hybridus	http://mediaphoto.mnhn.fr/media/1441402872134ks9XYabnp38lqmbW
436960974	P00273026	7	9	0	0	6	0	P_Train	Convolvulaceae	Ipomoea	Ipomoea pes-caprae	http://mediaphoto.mnhn.fr/media/14413679373267guUA4qnhR18YmGL
436961033	P00057524	30	0	0	0	5	0	P_Train	Melastomataceae	Astronidium	Astronidium anomalum	http://mediaphoto.mnhn.fr/media/1442345111056E64YZPzqq3ZzPiTb
436961164	P00039137	30	7	0	0	14	1	P_Train	Apiaceae	Bupleurum	Bupleurum subovatum	http://mediaphoto.mnhn.fr/media/1441377511186wK8RZ7Jijp9Q6Kb3
436961186	P00048275	12	3	0	0	4	0	P_Train	Rutaceae	Melicope	Melicope obtusifolia	http://mediaphoto.mnhn.fr/media/1442344778009gJ6UekNBJeE9UVbi
436961198	P00104152	5	4	0	0	2	0	P_Train	Myrtaceae	Arillastrum	Arillastrum gummiferum	http://mediaphoto.mnhn.fr/media/1441400890900vhkb0weOhqd9MEXP
436961200	P00239482	4	0	0	0	2	0	P_Train	Myrtaceae	Arillastrum	Arillastrum gummiferum	http://mediaphoto.mnhn.fr/media/1441398950952Ctiw70mWnDh767lp
436961204	P00104117	4	0	0	0	3	0	P_Train	Myrtaceae	Arillastrum	Arillastrum gummiferum	http://mediaphoto.mnhn.fr/media/1441400358964Ee7EpPk4yPgiXY4H
436961213	P00104586	6	5	0	0	2	0	P_Train	Myrtaceae	Metrosideros	Metrosideros laurifolia	http://mediaphoto.mnhn.fr/media/1441395711376eDuobapMkuEWLG2n
436961224	P00110345	13	3	0	0	3	0	P_Train	Myrtaceae	Melaleuca	Melaleuca quinquenervia	http://mediaphoto.mnhn.fr/media/14413985470937QDLe9wOzsyYD65j
436961225	P00110340	8	5	0	0	1	0	P_Train	Myrtaceae	Melaleuca	Melaleuca quinquenervia	http://mediaphoto.mnhn.fr/media/1441401692179yZmF1ZHTm7agXm69
436961243	P00110132	17	16	0	0	5	0	P_Train	Myrtaceae	Cloezia	Cloezia floribunda	http://mediaphoto.mnhn.fr/media/1441424476259lXFLtncXMnBWRjQZ
436961245	P00110123	9	14	0	0	3	0	P_Train	Myrtaceae	Cloezia	Cloezia floribunda	http://mediaphoto.mnhn.fr/media/1441424475522XLSDcYWVGDLbnt7n
436961246	P00110122	13	11	0	0	4	0	P_Train	Myrtaceae	Cloezia	Cloezia floribunda	http://mediaphoto.mnhn.fr/media/1441424475453oPBykWqzovX7dbbE
436961255	P00110078	35	28	0	0	7	0	P_Train	Myrtaceae	Cloezia	Cloezia floribunda	http://mediaphoto.mnhn.fr/media/1441424383855v8KXtUasAdDNKYju
436961256	P00110075	22	0	25	0	7	0	P_Train	Myrtaceae	Cloezia	Cloezia floribunda	http://mediaphoto.mnhn.fr/media/1441424383504SdK8PFf6K5QbHZBj
436961257	P00110071	26	59	0	0	14	0	P_Train	Myrtaceae	Cloezia	Cloezia floribunda	http://mediaphoto.mnhn.fr/media/14414243830734zwIti7NOLUrjnG2
436961258	P00110067	20	43	0	0	7	0	P_Train	Myrtaceae	Cloezia	Cloezia floribunda	http://mediaphoto.mnhn.fr/media/14414243826446wnnhWEPWMxkjSrr
436961259	P00110066	7	11	0	0	6	0	P_Train	Myrtaceae	Cloezia	Cloezia floribunda	http://mediaphoto.mnhn.fr/media/1441424382507kuaGfs03HYQJe544
436961260	P00110062	5	0	10	0	3	0	P_Train	Myrtaceae	Cloezia	Cloezia floribunda	http://mediaphoto.mnhn.fr/media/1441424382134EVCSvix1llAvNGAX
436961261	P00110061	26	44	0	0	16	0	P_Train	Myrtaceae	Cloezia	Cloezia floribunda	http://mediaphoto.mnhn.fr/media/1441424382050jtbiR8YRdJ155EXl
436961262	P00110040	21	26	0	0	5	0	P_Train	Myrtaceae	Cloezia	Cloezia floribunda	http://mediaphoto.mnhn.fr/media/14414246368894Z9rOLJOj2Dh94ao
436961272	P00105460	24	15	0	0	3	0	P_Train	Myrtaceae	Cloezia	Cloezia deplanchei	http://mediaphoto.mnhn.fr/media/1441400608673TAiDa3p2vrAyMVPr
436961274	P00110667	58	10	0	0	7	0	P_Train	Myrtaceae	Metrosideros	Metrosideros operculata	http://mediaphoto.mnhn.fr/media/1441425042316aVVHESKJ019Kg4jz
436961275	P00110663	13	2	0	0	3	0	P_Train	Myrtaceae	Metrosideros	Metrosideros operculata	http://mediaphoto.mnhn.fr/media/1441425042167XEY6d2NOB8AznF6n
436961283	P00110535	17	0	0	0	3	0	P_Train	Myrtaceae	Metrosideros	Metrosideros microphylla	http://mediaphoto.mnhn.fr/media/1441424861491kwcQlHxi0IcgG3WJ
436961298	P00110428	32	40	0	0	10	0	P_Train	Myrtaceae	Metrosideros	Metrosideros brevistylis	http://mediaphoto.mnhn.fr/media/1441425450612NDGCsJQi2ePRPJmm
436961300	P00239307	27	17	0	0	5	0	P_Train	Myrtaceae	Metrosideros	Metrosideros brevistylis	http://mediaphoto.mnhn.fr/media/14414243560571dR8Vr1xOQ8K2eAy
436961302	P00110432	34	8	0	0	5	0	P_Train	Myrtaceae	Metrosideros	Metrosideros brevistylis	http://mediaphoto.mnhn.fr/media/1441425450784GnDRmF72ZEWFVUiJ
436961304	P00110395	30	15	0	0	5	0	P_Train	Myrtaceae	Metrosideros	Metrosideros brevistylis	http://mediaphoto.mnhn.fr/media/1441425447043KkYr8SyvESfOxkPe
436961414	P00039243	16	6	2	0	3	0	P_Train	Fabaceae	Senna	Senna splendida	http://mediaphoto.mnhn.fr/media/1441329357289hYLP7eeJve4VZCrN
436961420	P00502294	1	4	0	0	7	0	P_Train	Fabaceae	Mucuna	Mucuna pruriens	http://mediaphoto.mnhn.fr/media/1441328905546mXUE59eCDP8f0tpc
436961422	P00070014	28	9	0	0	16	0	P_Train	Fabaceae	Chamaecrista	Chamaecrista cytisoides	http://mediaphoto.mnhn.fr/media/1441353227150tbwTlSpzsobWzoTx
436961423	P00039267	31	8	2	0	8	0	P_Train	Fabaceae	Chamaecrista	Chamaecrista cytisoides	http://mediaphoto.mnhn.fr/media/1441330017377z3znipQZg8WjGQey
436961479	P00569781	45	5	0	0	25	0	P_Train	Malvaceae	Kosteletzkya	Kosteletzkya diplocrater	http://mediaphoto.mnhn.fr/media/1441390179371ubFnOjz8WAzFyKRD
436961481	P00569433	23	3	0	0	16	0	P_Train	Malvaceae	Kosteletzkya	Kosteletzkya diplocrater	http://mediaphoto.mnhn.fr/media/1441390179192XRKvA2yZ0YKudQcl
436961483	P00574209	6	3	0	0	3	0	P_Train	Malvaceae	Kosteletzkya	Kosteletzkya diplocrater	http://mediaphoto.mnhn.fr/media/1441452986986SGRdE3xFftfMGuQA
436961484	P00574660	41	6	0	0	14	0	P_Train	Malvaceae	Kosteletzkya	Kosteletzkya diplocrater	http://mediaphoto.mnhn.fr/media/14414536200557zA1RHV9Jkwbgmr7
436961495	P00496458	21	0	3	0	5	0	P_Train	Combretaceae	Terminalia	Terminalia seyrigii	http://mediaphoto.mnhn.fr/media/1441423550645K87mfEPrDx5B0YtB
436961496	P00496461	31	0	26	0	6	0	P_Train	Combretaceae	Terminalia	Terminalia seyrigii	http://mediaphoto.mnhn.fr/media/1441423550901zrizR0wqA155bZ1h
436961497	P00496467	22	0	1	0	6	0	P_Train	Combretaceae	Terminalia	Terminalia seyrigii	http://mediaphoto.mnhn.fr/media/1441423551382DRIJoMAllG3nijha
436961524	P00048379	25	12	0	0	8	0	P_Train	Rutaceae	Vepris	Vepris humbertii	http://mediaphoto.mnhn.fr/media/1442345231573uQzKw2dgX15qYG20
436961567	P00255851	22	12	0	0	7	0	P_Train	Malvaceae	Grewia	Grewia triflora	http://mediaphoto.mnhn.fr/media/144139078547786CDrTgALhXrmxqy
436961573	P00255845	13	21	0	0	7	0	P_Train	Malvaceae	Grewia	Grewia triflora	http://mediaphoto.mnhn.fr/media/1441390785357MN8edG4QBnI2VaVU
436961582	P00448478	0	4	0	0	5	0	P_Train	Didiereaceae	Decarya	Decarya madagascariensis	http://mediaphoto.mnhn.fr/media/14413805567159vSD2AJ094RSadvz
436961594	P00165693	32	21	0	0	9	0	P_Train	Picrodendraceae	Scagea	Scagea depauperata	http://mediaphoto.mnhn.fr/media/14414398739671LBcpHFNKOULpxXw
436961800	P00037342	33	8	0	0	7	0	P_Train	Malvaceae	Dombeya	Dombeya apikyensis	http://mediaphoto.mnhn.fr/media/1442314300321sPcRV81I1W4cXJuj
436962013	P00569534	1	5	0	0	2	0	P_Train	Ochnaceae	Campylospermum	Campylospermum obtusifolium	http://mediaphoto.mnhn.fr/media/1446815269871lvB8ZGvHLyg4Ip9r
436962014	P00048440	9	35	0	0	4	0	P_Train	Ochnaceae	Campylospermum	Campylospermum humblotii	http://mediaphoto.mnhn.fr/media/1442422596861yKdRtbHAnNiLQQmh
436962071	P00684791	10	6	0	0	8	1	P_Train	Balsaminaceae	Impatiens	Impatiens auricoma	http://mediaphoto.mnhn.fr/media/1441341794381Ivm0DqkPrh06torl
436962073	P00102744	2	5	0	0	4	0	P_Train	Balsaminaceae	Impatiens	Impatiens auricoma	http://mediaphoto.mnhn.fr/media/1441341575928F9guKztHF0dXKsTi
436962107	P00239530	5	0	1	0	0	0	P_Train	Pandanaceae	Pandanus	Pandanus decumbens	http://mediaphoto.mnhn.fr/media/1441304769787aUSQjjMkMvmEfEvM
436962116	P00475235	16	3	0	0	6	0	P_Train	Cucurbitaceae	Momordica	Momordica charantia	http://mediaphoto.mnhn.fr/media/14414463820233CGawCnsIMg3WXJi
436962120	P00052870	12	2	2	0	6	0	P_Train	Cucurbitaceae	Momordica	Momordica charantia	http://mediaphoto.mnhn.fr/media/144145343729338QJhieT15MYLc0P
436962135	P00109039	1	0	0	0	0	0	P_Train	Orchidaceae	Oeceoclades	Oeceoclades calcarata	http://mediaphoto.mnhn.fr/media/1441306021958sXfJZiNdqgKWThi1
436962140	P00108906	12	0	0	0	7	0	P_Train	Orchidaceae	Eulophia	Eulophia ramosa	http://mediaphoto.mnhn.fr/media/1441306213931LkzcllMLKG00g4FO
436962171	P00350000	4	0	1	0	2	1	P_Train	Orchidaceae	Satyrium	Satyrium trinerve	http://mediaphoto.mnhn.fr/media/1441306512128iC90TVMrvJ614Qx8
436962173	P00109798	6	0	1	0	3	1	P_Train	Orchidaceae	Satyrium	Satyrium trinerve	http://mediaphoto.mnhn.fr/media/1441306425712pO6BjInxot7Y6zmz
436962220	P00216059	7	0	0	0	2	0	P_Train	Orchidaceae	Angraecum		http://mediaphoto.mnhn.fr/media/1441306892388XSbwOhdXjZ3o80On
436962246	P00505250	7	1	0	0	2	0	P_Train	Ranunculaceae	Anemone	Anemone nemorosa	http://mediaphoto.mnhn.fr/media/1441348864667wFWMXYD9RxF7gKjM
436962339	P00122969	27	18	0	0	12	0	P_Train	Asteraceae	Eclipta	Eclipta prostrata	http://mediaphoto.mnhn.fr/media/1441340341981S1NiSQ7DXROM1D6L
436962383	P00443542	9	19	0	0	14	0	P_Train	Crassulaceae	Kalanchoe	Kalanchoe pinnata	http://mediaphoto.mnhn.fr/media/1441356405438lQhQpV9qJjpepIi7
436962391	P00209167	8	1	2	0	8	0	P_Train	Passifloraceae	Passiflora	Passiflora suberosa	http://mediaphoto.mnhn.fr/media/1441341581637dVbkeGYl97xkLn43
436962392	P00209166	5	0	2	0	9	0	P_Train	Passifloraceae	Passiflora	Passiflora suberosa	http://mediaphoto.mnhn.fr/media/1441341581617bQvChgzO7jrldai5
436962394	P00427525	7	5	0	0	6	0	P_Train	Convolvulaceae	Ipomoea	Ipomoea alba	http://mediaphoto.mnhn.fr/media/1441366366116utjD1HSmOBM5mBr6
436962397	P00198344	2	3	0	0	3	0	P_Train	Convolvulaceae	Ipomoea	Ipomoea alba	http://mediaphoto.mnhn.fr/media/1441366400791hQ2Vh1V6uo5zLrQo
436962433	P016431	16	7	0	0	5	0	P_Train	Asteraceae	Aspilia	Aspilia elegans	http://mediaphoto.mnhn.fr/media/1441343390317zuJdxagoca01QX5B
436962492	P00116035	19	1	7	0	4	0	P_Train	Myrtaceae	Tristaniopsis	Tristaniopsis polyandra	http://mediaphoto.mnhn.fr/media/1441420540677YQJHNOqeo4AnwmQV
436962493	P00116034	20	12	0	0	8	0	P_Train	Myrtaceae	Tristaniopsis	Tristaniopsis polyandra	http://mediaphoto.mnhn.fr/media/1441420540558XmLV1nv61YmoEJrD
436962851	P00039919	23	31	0	0	5	0	P_Train	Malvaceae	Dombeya	Dombeya bathiei	http://mediaphoto.mnhn.fr/media/1442314330253ApVwhDVoEpvQxILW
436963034	P00735380	61	0	18	0	18	0	P_Train	Olacaceae	Olax	Olax lanceolata	http://mediaphoto.mnhn.fr/media/1441383929612UJHvKaWw2jwotA0H
436963054	P00113570	20	0	22	0	6	0	P_Train	Myrtaceae	Tristaniopsis	Tristaniopsis capitulata	http://mediaphoto.mnhn.fr/media/1441429766640S0SMTlYiczxWXEjx
436963055	P00113545	23	7	5	0	8	0	P_Train	Myrtaceae	Tristaniopsis	Tristaniopsis capitulata	http://mediaphoto.mnhn.fr/media/1441429694335ZxmQxzgBz5pnobWT
436963063	P00113502	31	7	0	0	1	0	P_Train	Myrtaceae	Tristaniopsis	Tristaniopsis callobuxus	http://mediaphoto.mnhn.fr/media/1441395857939LTlnE67a2TLDJsSc
436963070	P00113463	18	4	0	0	2	0	P_Train	Myrtaceae	Tristaniopsis	Tristaniopsis callobuxus	http://mediaphoto.mnhn.fr/media/1441424267767JEZMJ9Qkvf2tuChQ
436963071	P00113459	39	18	0	0	5	0	P_Train	Myrtaceae	Tristaniopsis	Tristaniopsis callobuxus	http://mediaphoto.mnhn.fr/media/1441424267399jBu2anQS7QguODjl
436963072	P00113456	23	1	0	0	3	0	P_Train	Myrtaceae	Tristaniopsis	Tristaniopsis callobuxus	http://mediaphoto.mnhn.fr/media/1441424267079rUYXzw6WKFxJAQ5r
436963087	P00116227	1	0	0	0	1	0	P_Train	Myrtaceae	Xanthostemon	Xanthostemon gugerlii	http://mediaphoto.mnhn.fr/media/1441395912435L95FdDwuIR8sl5Z3
436963111	P00431637	14	3	0	0	4	0	P_Train	Solanaceae	Datura	Datura metel	http://mediaphoto.mnhn.fr/media/1441365121685Txe5m9zVEX0EEWwJ
436963140	P00062923	10	4	0	0	5	0	P_Train	Solanaceae	Datura	Datura metel	http://mediaphoto.mnhn.fr/media/1441364829663YRyyQrpD0KGmSn7t
436963150	P00057827	7	0	4	0	4	0	P_Train	Solanaceae	Datura	Datura metel	http://mediaphoto.mnhn.fr/media/14413642276528fIHZifYFjCwaWzs
436963152	P00057807	4	1	0	0	2	0	P_Train	Solanaceae	Datura	Datura metel	http://mediaphoto.mnhn.fr/media/1441364227486l8O7ohf3hYWl74R5
436963153	P00054339	4	3	0	0	2	0	P_Train	Solanaceae	Datura	Datura metel	http://mediaphoto.mnhn.fr/media/14413648214384d1ruZTiLmQ4Ms0r
436963154	P00116079	8	5	0	0	0	0	P_Train	Myrtaceae	Xanthostemon	Xanthostemon aurantiacus	http://mediaphoto.mnhn.fr/media/1441420546149Rro28XS4Z3J0Ngrq
436963156	P00116123	15	11	0	0	5	0	P_Train	Myrtaceae	Xanthostemon	Xanthostemon aurantiacus	http://mediaphoto.mnhn.fr/media/1441424270278mjoMMp2vhI0IkauX
436963161	P00116118	11	8	0	0	3	0	P_Train	Myrtaceae	Xanthostemon	Xanthostemon aurantiacus	http://mediaphoto.mnhn.fr/media/1441424269743ZvxkgCrZdkt0lTPq
436963164	P00116094	7	7	0	0	2	0	P_Train	Myrtaceae	Xanthostemon	Xanthostemon aurantiacus	http://mediaphoto.mnhn.fr/media/1441420689420geyZWGJusSnuhMoD
436963171	P00116341	5	3	0	0	2	0	P_Train	Myrtaceae	Xanthostemon	Xanthostemon macrophyllus	http://mediaphoto.mnhn.fr/media/1441420693368IVfT0rEDp5ckeS9j
436963172	P00116335	2	0	0	0	0	0	P_Train	Myrtaceae	Xanthostemon	Xanthostemon macrophyllus	http://mediaphoto.mnhn.fr/media/1441421511702W0niuBxkHvxnlwKn
436963174	P00116331	4	1	0	0	0	0	P_Train	Myrtaceae	Xanthostemon	Xanthostemon macrophyllus	http://mediaphoto.mnhn.fr/media/1441421511569WPGUU48a6D0sVYrI
436963176	P00116327	9	5	0	0	0	0	P_Train	Myrtaceae	Xanthostemon	Xanthostemon macrophyllus	http://mediaphoto.mnhn.fr/media/1441421511463iukO0pOu9c2iuYKW
436963178	P00116267	17	9	0	0	8	0	P_Train	Myrtaceae	Xanthostemon	Xanthostemon laurinus	http://mediaphoto.mnhn.fr/media/1441395908769zQ8tB3Dylgb5MBrt
436963180	P00116294	5	2	0	0	1	0	P_Train	Myrtaceae	Xanthostemon	Xanthostemon laurinus	http://mediaphoto.mnhn.fr/media/1441420692125MsX5kZ4R0MRDNPKt
436963182	P00116273	5	4	0	0	0	0	P_Train	Myrtaceae	Xanthostemon	Xanthostemon laurinus	http://mediaphoto.mnhn.fr/media/14413959091473VgJkUr2fOZ48zPe
436963183	P00116270	4	5	0	0	1	0	P_Train	Myrtaceae	Xanthostemon	Xanthostemon laurinus	http://mediaphoto.mnhn.fr/media/14413959089509ZorJsWMwZF45iNs
436963186	P00116256	9	10	0	0	4	0	P_Train	Myrtaceae	Xanthostemon	Xanthostemon laurinus	http://mediaphoto.mnhn.fr/media/1441395908354fqMviMrVA4rmtI4V
436963197	P00116469	2	4	0	0	1	0	P_Train	Myrtaceae	Xanthostemon	Xanthostemon multiflorus	http://mediaphoto.mnhn.fr/media/1441420942832K80qSkBRcFwizMDm
436963199	P00116441	18	0	7	0	4	0	P_Train	Myrtaceae	Xanthostemon	Xanthostemon multiflorus	http://mediaphoto.mnhn.fr/media/1441421768586D5zCXxQPu8dXVfRC
436963200	P00116440	25	0	5	0	6	0	P_Train	Myrtaceae	Xanthostemon	Xanthostemon multiflorus	http://mediaphoto.mnhn.fr/media/1441420831891TGIeGk3ABnlheaWC
436963202	P00116430	16	0	7	0	5	0	P_Train	Myrtaceae	Xanthostemon	Xanthostemon multiflorus	http://mediaphoto.mnhn.fr/media/14414208308545iy5kyiRq7CWCWQV
436963203	P00116429	4	3	0	0	2	0	P_Train	Myrtaceae	Xanthostemon	Xanthostemon multiflorus	http://mediaphoto.mnhn.fr/media/1441420830795ob3ZJ6Y0VXARE6bd
436963204	P00116424	7	0	6	0	2	0	P_Train	Myrtaceae	Xanthostemon	Xanthostemon multiflorus	http://mediaphoto.mnhn.fr/media/1441421768426ltT5nq1avO82OR8W
436963206	P00116388	10	2	0	0	1	0	P_Train	Myrtaceae	Xanthostemon	Xanthostemon multiflorus	http://mediaphoto.mnhn.fr/media/1441420826998akeBeuxpOt04vAq0
436963211	P00061862	13	0	6	0	4	0	P_Train	Myrtaceae	Xanthostemon	Xanthostemon multiflorus	http://mediaphoto.mnhn.fr/media/1443062699118WQDUSbpIV05cgcj7
436963212	P00061861	8	1	1	0	4	0	P_Train	Myrtaceae	Xanthostemon	Xanthostemon multiflorus	http://mediaphoto.mnhn.fr/media/1443062684777swu3CKTChrCzoxwv
436963220	P00116511	36	6	1	0	6	0	P_Train	Myrtaceae	Xanthostemon	Xanthostemon myrtifolius	http://mediaphoto.mnhn.fr/media/1441418103524oXGlx8hK2AfDyTSD
436963228	P00310017	16	0	5	0	10	0	P_Train	Moraceae	Trophis	Trophis montana	http://mediaphoto.mnhn.fr/media/1441450335066mmBmThA2CBKBGlvo
436963230	P00209704	18	4	0	0	12	0	P_Train	Moraceae	Trophis	Trophis montana	http://mediaphoto.mnhn.fr/media/1441449578334USeVvlkrLhaTP00N
436963235	P00108213	29	0	14	0	9	0	P_Train	Moraceae	Trophis	Trophis montana	http://mediaphoto.mnhn.fr/media/1441450664867T81MmkrPLWVnlfOI
436963237	P00120073	10	4	0	0	3	0	P_Train	Myrtaceae	Xanthostemon	Xanthostemon sulfureus	http://mediaphoto.mnhn.fr/media/14413985419671iWJ1AVrrqqKngkO
436963239	P00120065	11	0	2	0	7	0	P_Train	Myrtaceae	Xanthostemon	Xanthostemon sulfureus	http://mediaphoto.mnhn.fr/media/14413985410691ZLWIJr61ePtV80w
436963240	P00120061	2	0	0	0	1	0	P_Train	Myrtaceae	Xanthostemon	Xanthostemon sulfureus	http://mediaphoto.mnhn.fr/media/1441398540529LDp5czE0GdTTdkcj
436963242	P00116587	11	6	0	0	4	0	P_Train	Myrtaceae	Xanthostemon	Xanthostemon ruber	http://mediaphoto.mnhn.fr/media/1441423922962z1PkzXF97rfp8wk1
436963249	P00120040	9	3	0	0	2	0	P_Train	Myrtaceae	Xanthostemon	Xanthostemon ruber	http://mediaphoto.mnhn.fr/media/1441398812341shgrertgrdWONnqa
436963251	P00120030	18	1	0	0	5	0	P_Train	Myrtaceae	Xanthostemon	Xanthostemon ruber	http://mediaphoto.mnhn.fr/media/1441398809649b9mtze6mSAnb3iO8
436963252	P00120025	21	0	2	0	4	0	P_Train	Myrtaceae	Xanthostemon	Xanthostemon ruber	http://mediaphoto.mnhn.fr/media/1441398808890AlK1XPlHswl8g2Oh
436963253	P00120021	14	0	3	0	8	0	P_Train	Myrtaceae	Xanthostemon	Xanthostemon ruber	http://mediaphoto.mnhn.fr/media/1441398808553xbWvnyADAKONpOtu
436963254	P00120018	14	6	0	0	5	0	P_Train	Myrtaceae	Xanthostemon	Xanthostemon ruber	http://mediaphoto.mnhn.fr/media/1441398808370axC2LwcUMcg2Xfjc
436963255	P00120013	21	13	0	0	3	0	P_Train	Myrtaceae	Xanthostemon	Xanthostemon ruber	http://mediaphoto.mnhn.fr/media/1441398807799cijUoqPlh9LqsWyl
436963258	P00116579	23	4	0	0	6	0	P_Train	Myrtaceae	Xanthostemon	Xanthostemon pubescens	http://mediaphoto.mnhn.fr/media/1441398539810n5EgA4kfomL6xXCN
436963260	P00116563	24	3	1	0	5	0	P_Train	Myrtaceae	Xanthostemon	Xanthostemon pubescens	http://mediaphoto.mnhn.fr/media/1441398538313TIbdiUfmYeaGSXb9
436963328	P00039954	12	6	0	0	2	0	P_Train	Malvaceae	Dombeya	Dombeya catatii	http://mediaphoto.mnhn.fr/media/1442314614760A4YaqkirN8wu55iY
436963408	P00057871	34	34	0	0	16	0	P_Train	Solanaceae	Lycianthes	Lycianthes biflora	http://mediaphoto.mnhn.fr/media/1441364036316IuiiFWnaljSY9UHL
436963412	P00074881	8	0	6	0	3	0	P_Train	Solanaceae	Lycianthes	Lycianthes biflora	http://mediaphoto.mnhn.fr/media/1441408035133c8z0rACYYT8LncfO
436963421	P00057912	44	0	16	0	16	0	P_Train	Solanaceae	Lycianthes	Lycianthes biflora	http://mediaphoto.mnhn.fr/media/1441364037063jmOBzFHBgBtajbLq
436963422	P00057911	16	3	0	0	9	0	P_Train	Solanaceae	Lycianthes	Lycianthes biflora	http://mediaphoto.mnhn.fr/media/1441364037044EwlflEoxZinys6db
436963456	P00244443	24	19	0	0	17	1	P_Train	Gentianaceae	Exacum	Exacum exiguum	http://mediaphoto.mnhn.fr/media/1441372362455Z4H6yuHYm1XOGY8Q
436963459	P00244332	16	4	0	0	4	6	P_Train	Gentianaceae	Exacum	Exacum humbertii	http://mediaphoto.mnhn.fr/media/1441372336380VfbK7PdByu6Y6IbL
436963488	P00244369	16	14	0	0	13	3	P_Train	Gentianaceae	Exacum	Exacum linearifolium	http://mediaphoto.mnhn.fr/media/1441372325617DtlhQDLtXXEQ4ehh
436963489	P00244548	20	19	0	0	18	6	P_Train	Gentianaceae	Exacum	Exacum linearifolium	http://mediaphoto.mnhn.fr/media/1441372325747G1fRkhU9ySx8Az0h
436963495	P00061938	27	12	0	0	16	0	P_Train	Gentianaceae	Exacum	Exacum millotii	http://mediaphoto.mnhn.fr/media/1442503806527jOPjQVOf0bVLrZZy
436963499	P00245872	62	3	0	0	22	0	P_Train	Gentianaceae	Gentianothamnus	Gentianothamnus madagascariensis	http://mediaphoto.mnhn.fr/media/1441372299560rsiuoykcoQotGIle
436963504	P00249136	11	10	0	0	7	1	P_Train	Gentianaceae	Sebaea	Sebaea brachyphylla	http://mediaphoto.mnhn.fr/media/1441372352334h6sKHHVEBGaCWvCF
436963506	P00249125	22	8	0	0	19	3	P_Train	Gentianaceae	Sebaea	Sebaea brachyphylla	http://mediaphoto.mnhn.fr/media/1441372352133l2wiQ5RobbfZkjjm
436963507	P00249124	26	7	0	0	27	1	P_Train	Gentianaceae	Sebaea	Sebaea brachyphylla	http://mediaphoto.mnhn.fr/media/1441372352116GFZ4eDcreLU0Dbf3
436963508	P00249120	15	6	0	0	18	1	P_Train	Gentianaceae	Sebaea	Sebaea brachyphylla	http://mediaphoto.mnhn.fr/media/1441372352042M2qiY15eJbuuOKqI
436963536	P00071975	4	11	0	0	3	0	P_Train	Quiinaceae	Quiina	Quiina obovata	http://mediaphoto.mnhn.fr/media/1441439096540jYLAg8qL6Cg9Gr4n
436963601	P02296423	25	25	0	0	7	0	P_Train	Malvaceae	Grewia	Grewia humbertii	http://mediaphoto.mnhn.fr/media/1441389428513IaygYZowo9BeOZaP
436963605	P00255763	16	7	0	0	7	0	P_Train	Malvaceae	Grewia	Grewia humbertii	http://mediaphoto.mnhn.fr/media/1441389406928JDy2rmeJvmGetkIB
436963611	P00257325	50	57	0	0	20	0	P_Train	Malvaceae	Grewia	Grewia tulearensis	http://mediaphoto.mnhn.fr/media/1441390225780BQJJGsI631MFO17j
436963625	P00262607	67	22	0	0	23	0	P_Train	Malvaceae	Grewia	Grewia grevei	http://mediaphoto.mnhn.fr/media/1441390991212nEDkDFu59qQw1Jyg
436963628	P00262615	51	31	0	0	23	0	P_Train	Malvaceae	Grewia	Grewia grevei	http://mediaphoto.mnhn.fr/media/1441390991313Vcr4VrgzqokiwODs
436963641	P00084533	38	13	0	0	9	0	P_Train	Lamiaceae	Capitanopsis	Capitanopsis angustifolia	http://mediaphoto.mnhn.fr/media/1441352592873EDhvUr1RYA7g5Hjd
436963664	P00443915	3	4	0	0	3	0	P_Train	Crassulaceae	Kalanchoe	Kalanchoe synsepala	http://mediaphoto.mnhn.fr/media/1441356439115RII7mCHcfnYQzCGn
436963666	P00443945	1	4	0	0	4	0	P_Train	Crassulaceae	Kalanchoe	Kalanchoe synsepala	http://mediaphoto.mnhn.fr/media/1441356439509b1YR6H3uswCoVSaZ
436963727	P00123166	18	8	0	0	10	0	P_Train	Asteraceae	Synedrella	Synedrella nodiflora	http://mediaphoto.mnhn.fr/media/1441339825018VdkmpxOhEyOV7YJn
436963737	P00073487	11	4	0	0	8	0	P_Train	Asteraceae	Synedrella	Synedrella nodiflora	http://mediaphoto.mnhn.fr/media/1441343363338FZHq8rKb53O323Jz
436963809	P00755143	3	2	0	0	1	1	P_Train	Orchidaceae	Polystachya	Polystachya cultriformis	http://mediaphoto.mnhn.fr/media/1441306795634kNwSw96vKRU13TyD
436963813	P00376029	3	2	0	0	2	2	P_Train	Orchidaceae	Polystachya	Polystachya cultriformis	http://mediaphoto.mnhn.fr/media/1441306413481jSKhrxYh1iHakImI
436963814	P00376016	2	8	0	0	8	1	P_Train	Orchidaceae	Polystachya	Polystachya cultriformis	http://mediaphoto.mnhn.fr/media/1441306388736MMLWv8VzkugflDYK
436963860	P00078370	7	4	0	0	5	0	P_Train	Lamiaceae	Oxera	Oxera glandulosa	http://mediaphoto.mnhn.fr/media/1441362874586AsrA2AyQKFzWRR6L
436963866	P00077807	5	2	0	0	3	0	P_Train	Malvaceae	Grewia	Grewia bivalvis	http://mediaphoto.mnhn.fr/media/1442321421081z7kGtgRMN2bEwMpo
436963901	P00081172	3	2	0	0	4	2	P_Train	Orchidaceae	Liparis	Liparis loeselii	http://mediaphoto.mnhn.fr/media/1441306134404RZanrzeCBLm1YUR6
436963903	P00077870	3	0	0	0	2	0	P_Train	Myrtaceae	Eugenia	Eugenia gabonensis	http://mediaphoto.mnhn.fr/media/1442338815920uBReTpEgXZJeHIlk
436963904	P00077868	2	0	1	0	2	0	P_Train	Myrtaceae	Eugenia	Eugenia gabonensis	http://mediaphoto.mnhn.fr/media/1442338819198a28PuaSBcinxSj5j
436963932	P00339191	4	3	0	0	1	0	P_Train	Orchidaceae	Jumellea		http://mediaphoto.mnhn.fr/media/1441305595709VeNAAaOydTHlLaIO
436963954	P00239866	13	19	0	0	6	0	P_Train	Thymelaeaceae	Solmsia	Solmsia calophylla	http://mediaphoto.mnhn.fr/media/1441389891625Xx9dK9rKDjb0Tmje
436963974	P00098282	4	0	0	0	5	0	P_Train	Orchidaceae	Polystachya	Polystachya rosea	http://mediaphoto.mnhn.fr/media/1441306737131u82n0j0uFuzwUAtZ
436963977	P00755087	4	8	0	0	5	2	P_Train	Orchidaceae	Cynorkis	Cynorkis fastigiata	http://mediaphoto.mnhn.fr/media/1441306220203eyC7o4gCTXppz4yb
436963991	P00205994	2	3	0	0	3	1	P_Train	Orchidaceae	Cynorkis	Cynorkis fastigiata	http://mediaphoto.mnhn.fr/media/1441306420399K13MDJorGtRSHx4j
436963992	P00205991	2	4	0	0	2	1	P_Train	Orchidaceae	Cynorkis	Cynorkis fastigiata	http://mediaphoto.mnhn.fr/media/1441306394685yIAl2vlJpdj67OFh
436963993	P00205985	4	3	0	0	4	2	P_Train	Orchidaceae	Cynorkis	Cynorkis fastigiata	http://mediaphoto.mnhn.fr/media/1441306394569NMqIKXIy6zIPcGLb
436963996	P00221860	5	4	0	0	1	0	P_Train	Euphorbiaceae	Euphorbia	Euphorbia lophogona	http://mediaphoto.mnhn.fr/media/1441436702363K3iav5ytyRcCP6NH
436964018	P00107229	4	5	0	0	4	3	P_Train	Orchidaceae	Beclardia	Beclardia macrostachya	http://mediaphoto.mnhn.fr/media/1441347251777m7zBQg91QXJov8t5
436964127	P00089129	54	20	0	0	10	0	P_Train	Acanthaceae	Anisostachya	Anisostachya rosea	http://mediaphoto.mnhn.fr/media/1442410118041XPkA2yc3b65IvbSs
436964130	P00072152	32	0	9	0	11	0	P_Train	Apocynaceae	Alyxia	Alyxia stellata	http://mediaphoto.mnhn.fr/media/14429592747260MWjS9BdOSCjCf8X
436964148	P00072154	30	7	2	0	15	0	P_Train	Apocynaceae	Alyxia	Alyxia rubricaulis	http://mediaphoto.mnhn.fr/media/1442926513152NXqFzUscJyAnsGn5
436964173	P00078922	46	0	0	0	16	0	P_Train	Euphorbiaceae	Euphorbia	Euphorbia pervilleana	http://mediaphoto.mnhn.fr/media/1441435475167XYjs5gJhdDf5RpyH
436964181	P00448436	0	1	0	0	1	0	P_Train	Didiereaceae	Didierea	Didierea madagascariensis	http://mediaphoto.mnhn.fr/media/1441380550453d8MAGaIC4PGCY0in
436964222	P00114700	18	28	0	0	9	0	P_Train	Phyllanthaceae	Wielandia	Wielandia bemarensis	http://mediaphoto.mnhn.fr/media/14414338831227zy3zfVkPoou86lu
436964235	P00502696	16	16	0	0	3	0	P_Train	Phyllanthaceae	Wielandia	Wielandia tanalorum	http://mediaphoto.mnhn.fr/media/1441433972386XWUpPbIGoeLtNCJ3
436964236	P00114775	10	7	0	0	5	0	P_Train	Phyllanthaceae	Wielandia	Wielandia tanalorum	http://mediaphoto.mnhn.fr/media/1441433926959LG6hoF7olSHBFPqU
436964241	P00078159	43	0	0	0	21	0	P_Train	Phyllanthaceae	Wielandia	Wielandia platyrachis	http://mediaphoto.mnhn.fr/media/14424798513654F4rdZLlvXuTQlae
436964250	P00047020	11	0	0	0	3	0	P_Train	Rubiaceae	Sabicea	Sabicea cinerea	http://mediaphoto.mnhn.fr/media/1441380318348qxJ5tpdCRYoXY2Zz
436964275	P00063300	15	9	0	0	5	0	P_Train	Asteraceae	Pulicaria	Pulicaria incisa	http://mediaphoto.mnhn.fr/media/1441343332742qZaGLQcaU4JfzTLJ
436964370	P00078276	24	0	0	0	16	0	P_Train	Phyllanthaceae	Phyllanthus	Phyllanthus renardii	http://mediaphoto.mnhn.fr/media/1441434328423ofvDqqbzxwU4MFtY
436964379	P00078349	6	7	0	0	1	0	P_Train	Lamiaceae	Oxera	Oxera crassifolia	http://mediaphoto.mnhn.fr/media/14413628093139wJWa1HpTSzCKBNH
436964387	P00162981	4	32	0	0	10	0	P_Train	Lamiaceae	Oxera	Oxera subverticillata	http://mediaphoto.mnhn.fr/media/1441362687081MlmYJG0rUYXdcJgW
436964401	P00083326	5	27	0	0	3	3	P_Train	Asparagaceae	Prospero	Prospero autumnale	http://mediaphoto.mnhn.fr/media/1442394311397AcmSbJCOmYHxTY4Z
436964411	P00073642	7	6	0	0	6	0	P_Train	Asteraceae	Guizotia	Guizotia scabra	http://mediaphoto.mnhn.fr/media/14413427542469XLl9M9DInXq6zyK
436964412	P00073641	20	14	0	0	5	1	P_Train	Asteraceae	Guizotia	Guizotia scabra	http://mediaphoto.mnhn.fr/media/1441342754228tOHGNQbwGDdqUtSQ
436964563	P00436357	7	13	0	0	6	0	P_Train	Primulaceae	Maesa	Maesa lanceolata	http://mediaphoto.mnhn.fr/media/1441379731284PpoRYxDD3djNgbQQ
436964600	P00072393	4	0	0	0	4	0	P_Train	Rubiaceae	Mitriostigma	Mitriostigma greenwayi	http://mediaphoto.mnhn.fr/media/1441375160409oiTUQrAq22Xf6uco
436964606	P00072415	14	0	4	0	9	0	P_Train	Rubiaceae	Tricalysia	Tricalysia obstetrix	http://mediaphoto.mnhn.fr/media/1442478480106FxjJLizwwxyiULhG
436964608	P00072446	8	0	0	0	3	0	P_Train	Rubiaceae	Tricalysia	Tricalysia bagshawei	http://mediaphoto.mnhn.fr/media/1441372839436CsZvxQsx0WEwDxbe
436964616	P00144694	14	23	0	0	21	0	P_Train	Lythraceae	Woodfordia	Woodfordia fruticosa	http://mediaphoto.mnhn.fr/media/14413402835129X2wimq3uZg2wUQQ
436964621	P00078418	4	0	0	0	2	0	P_Train	Lauraceae	Rhodostemonodaphne	Rhodostemonodaphne macrocalyx	http://mediaphoto.mnhn.fr/media/1441302812774osAo6G5gcVva4eWe
436964626	P00734040	22	0	26	0	22	0	P_Train	Rhamnaceae	Berchemia	Berchemia girardiana	http://mediaphoto.mnhn.fr/media/1443998335667MrLKhZS9AATvbVZM
436964672	P00083538	29	0	52	0	10	0	P_Train	Cunoniaceae	Cunonia	Cunonia aoupiniensis	http://mediaphoto.mnhn.fr/media/1441440973078BkY1ItFIJ9xfG86G
436964686	P00063686	13	2	1	0	6	1	P_Train	Asteraceae	Anisopappus		http://mediaphoto.mnhn.fr/media/1441343270998EBS4Vg82MMcUHM9y
436964687	P00063751	21	9	0	0	19	0	P_Train	Asteraceae	Anisopappus		http://mediaphoto.mnhn.fr/media/1441343271304mNdoiTRMDjAmJ9qF
436964697	P00064828	12	1	0	0	9	0	P_Train	Ranunculaceae	Clematis	Clematis mauritiana	http://mediaphoto.mnhn.fr/media/1442324500835sXgOyOgFhc3izsxM
436964702	P00072495	5	5	0	0	4	0	P_Train	Rubiaceae	Tricalysia	Tricalysia elliottii	http://mediaphoto.mnhn.fr/media/14424784184827qVSztvLDWXsQX0g
436964716	P00074031	19	0	0	0	9	0	P_Train	Rubiaceae	Empogona	Empogona ovalifolia	http://mediaphoto.mnhn.fr/media/1441376213027p35pmjQMgUGizWkt
436964755	P00500594	11	0	10	0	5	0	P_Train	Celastraceae	Elaeodendron	Elaeodendron cunninghamii	http://mediaphoto.mnhn.fr/media/1441447380553vcatuRtln5GE8fQI
436964758	P00478207	3	0	0	0	1	0	P_Train	Celastraceae	Elaeodendron	Elaeodendron cunninghamii	http://mediaphoto.mnhn.fr/media/1441447343348Gb0QMkNSHbS8eF5R
436964760	P00078585	25	27	0	0	13	0	P_Train	Celastraceae	Celastrus	Celastrus paniculatus	http://mediaphoto.mnhn.fr/media/14427213220332Bl5rs4DG9UImYHM
436964778	P00496933	27	37	0	0	6	0	P_Train	Celastraceae	Celastrus	Celastrus paniculatus	http://mediaphoto.mnhn.fr/media/1441441382947pbvDxhmZtPRHgD3N
436964779	P00496944	14	0	22	0	10	0	P_Train	Celastraceae	Celastrus	Celastrus paniculatus	http://mediaphoto.mnhn.fr/media/14414413832995SSaOs7taq9Q9b5r
436964784	P00500551	3	0	4	0	6	0	P_Train	Celastraceae	Salaciopsis	Salaciopsis neocaledonica	http://mediaphoto.mnhn.fr/media/1441446137348REyxIUUHwVvJoMN6
436964789	P00497294	46	18	0	0	12	0	P_Train	Celastraceae	Pleurostylia	Pleurostylia opposita	http://mediaphoto.mnhn.fr/media/1441441589013destAp8cLqqs5Mt2
436964791	P00497191	40	0	3	0	13	0	P_Train	Celastraceae	Pleurostylia	Pleurostylia opposita	http://mediaphoto.mnhn.fr/media/1441441588369YYQyRqwhMODgyGrU
436964800	P00497172	80	0	21	0	10	0	P_Train	Celastraceae	Menepetalum	Menepetalum cassinoides	http://mediaphoto.mnhn.fr/media/1441441363657rqkhwUkdibSQ15PA
436964802	P00497423	22	0	7	0	4	0	P_Train	Celastraceae	Denhamia	Denhamia fournieri	http://mediaphoto.mnhn.fr/media/14414414030917KwJJw2AU55pDhQi
436964804	P00497429	48	0	9	0	10	0	P_Train	Celastraceae	Denhamia	Denhamia fournieri	http://mediaphoto.mnhn.fr/media/1441441403232OjebplT7Xhfupsu7
436964814	P00246132	11	8	0	0	5	0	P_Train	Oleaceae	Noronhia	Noronhia cochleata	http://mediaphoto.mnhn.fr/media/1441341620227jEfsFffwjEwVcRAf
436964831	P016283	14	13	0	0	18	0	P_Train	Asteraceae	Crassocephalum	Crassocephalum guineense	http://mediaphoto.mnhn.fr/media/14413437006258yirOnzr9g7OOTGq
436964835	P00311607	9	0	6	0	4	0	P_Train	Violaceae	Amphirrhox	Amphirrhox longifolia	http://mediaphoto.mnhn.fr/media/1441431879808FL7KoK2ZiziUK5Bk
436964838	P00083619	1	0	0	0	3	0	P_Train	Annonaceae	Duguetia	Duguetia oligocarpa	http://mediaphoto.mnhn.fr/media/1443716527726A6gBLqEQqjzHOGNa
436964839	P00064859	6	5	0	0	5	0	P_Train	Apocynaceae	Alafia	Alafia falcata	http://mediaphoto.mnhn.fr/media/1441373410213RHUqgpN7Pz8K3kFL
436964884	P00491828	7	0	0	0	2	0	P_Train	Phyllanthaceae	Uapaca	Uapaca bojeri	http://mediaphoto.mnhn.fr/media/1441439322269euevopygnWdpp2lJ
436964887	P00059701	9	5	1	0	2	0	P_Train	Phyllanthaceae	Uapaca	Uapaca bojeri	http://mediaphoto.mnhn.fr/media/14468150306105c34sJyoqqND6oLQ
436964924	P00208826	14	0	6	0	13	0	P_Train	Salicaceae	Casearia		http://mediaphoto.mnhn.fr/media/14414285311785iqdaUE7TnWK4Iwx
436964990	P00078649	13	0	0	0	7	0	P_Train	Loranthaceae	Amyema	Amyema artensis	http://mediaphoto.mnhn.fr/media/1442958837559RLVhvXzGjFNkJQoU
436964991	P00497145	7	23	0	0	3	0	P_Train	Celastraceae	Menepetalum	Menepetalum salicifolius	http://mediaphoto.mnhn.fr/media/1441441294952kBkt718CiJy1V0gn
436965016	P00083765	64	2	0	0	14	0	P_Train	Acanthaceae	Ruellia	Ruellia perrieri	http://mediaphoto.mnhn.fr/media/1442404729184zLGHZT2GLzxnPLQP
436965028	P00065063	5	0	13	0	2	0	P_Train	Arecaceae	Actinokentia	Actinokentia divaricata	http://mediaphoto.mnhn.fr/media/1443197422508Ldz2uQ5TYMI09XoY
436965029	P00065062	0	0	6	0	0	0	P_Train	Arecaceae	Actinokentia	Actinokentia divaricata	http://mediaphoto.mnhn.fr/media/1443197420860jQ3DivDvi3o6BxeE
436965127	P00250745	8	4	0	0	5	4	P_Train	Orchidaceae	Disperis	Disperis oppositifolia	http://mediaphoto.mnhn.fr/media/144130644930537n79ye4FuVumfDX
436965128	P00437813	4	5	0	0	4	0	P_Train	Orchidaceae	Disperis	Disperis oppositifolia	http://mediaphoto.mnhn.fr/media/1464696841116VIql5hnKROTzBTlJ
436965135	P00250660	13	7	0	0	11	2	P_Train	Orchidaceae	Disperis	Disperis discifera	http://mediaphoto.mnhn.fr/media/1441306428201daGjX6DTntnyS1dp
436965145	P00255506	77	6	1	0	16	0	P_Train	Malvaceae	Grewia	Grewia androyensis	http://mediaphoto.mnhn.fr/media/1441390539376x2q6VLdGninfluT6
436965150	P00255483	18	7	0	0	13	0	P_Train	Malvaceae	Grewia	Grewia androyensis	http://mediaphoto.mnhn.fr/media/1441390501953XiqMGleDet8c7RO7
436965152	P00255476	54	6	0	0	21	0	P_Train	Malvaceae	Grewia	Grewia androyensis	http://mediaphoto.mnhn.fr/media/1441390501773TmZwR2M9xHOn1BfW
436965153	P00255475	95	19	0	0	16	0	P_Train	Malvaceae	Grewia	Grewia androyensis	http://mediaphoto.mnhn.fr/media/1441390501751kH4EWTwUVx48MFTL
436965154	P00255471	29	0	15	0	23	0	P_Train	Malvaceae	Grewia	Grewia androyensis	http://mediaphoto.mnhn.fr/media/1441390501650Yg2MVgJKRtR9rgky
436965170	P00346506	7	14	0	0	2	0	P_Train	Orchidaceae	Satyrium		http://mediaphoto.mnhn.fr/media/1441306401953QBA9LMzO7Vvx2rVk
436965180	P00749819	3	3	0	0	4	1	P_Train	Orchidaceae	Polystachya		http://mediaphoto.mnhn.fr/media/1441305058464wQo4qyP4o0gbnJ8r
436965193	P00749811	4	1	26	0	1	1	P_Train	Orchidaceae	Polystachya		http://mediaphoto.mnhn.fr/media/14413050868176tzPS8YLA1M80M4V
436965194	P00749803	4	3	11	0	5	1	P_Train	Orchidaceae	Polystachya		http://mediaphoto.mnhn.fr/media/1441305086794S43md8LRY5rvqPOd
436965196	P00735406	3	1	0	0	2	2	P_Train	Orchidaceae	Polystachya		http://mediaphoto.mnhn.fr/media/14413048405287gICB2F5MbK9hQ3i
436965200	P00334003	11	3	0	0	4	3	P_Train	Orchidaceae	Polystachya		http://mediaphoto.mnhn.fr/media/1441306960272EZPSJvT7ojxc7pIv
436965233	P00497884	18	0	4	0	7	0	P_Train	Lauraceae	Ocotea	Ocotea racemosa	http://mediaphoto.mnhn.fr/media/1441302814197k1KAYsuuHxvJ5eUJ
436965250	P00084053	13	9	0	0	5	0	P_Train	Asteraceae	Calendula	Calendula suffruticosa	http://mediaphoto.mnhn.fr/media/14423350794846YxSarlUkIij54uD
436965265	P00511405	23	0	3	0	2	0	P_Train	Apocynaceae	Mascarenhasia	Mascarenhasia speciosa	http://mediaphoto.mnhn.fr/media/1441371174639cUXHOaphEDjBMg8s
436965277	P00087437	7	4	0	0	3	0	P_Train	Apocynaceae	Stephanostegia	Stephanostegia hildebrandtii	http://mediaphoto.mnhn.fr/media/1441369920208IotnGT7MTUM73B5u
436965278	P00087572	32	8	0	0	6	0	P_Train	Apocynaceae	Craspidospermum	Craspidospermum verticillatum	http://mediaphoto.mnhn.fr/media/1441370583659dr2tB9P6JeIKeXHp
436965279	P00087540	17	6	0	0	6	0	P_Train	Apocynaceae	Craspidospermum	Craspidospermum verticillatum	http://mediaphoto.mnhn.fr/media/1441370563192Hm2IH4y0zilCbEcb
436965280	P00508779	20	8	0	0	3	0	P_Train	Apocynaceae	Craspidospermum	Craspidospermum verticillatum	http://mediaphoto.mnhn.fr/media/1441370611112zkcW7lNEEeqznobm
436965281	P00508780	6	2	0	0	3	0	P_Train	Apocynaceae	Craspidospermum	Craspidospermum verticillatum	http://mediaphoto.mnhn.fr/media/1441370611131INrjfeVQkeFvhGVt
436965283	P00508776	9	0	4	0	5	0	P_Train	Apocynaceae	Craspidospermum	Craspidospermum verticillatum	http://mediaphoto.mnhn.fr/media/144137132096067VOB3V9KduXxdHT
436965295	P00087594	4	8	0	0	4	0	P_Train	Apocynaceae	Craspidospermum	Craspidospermum verticillatum	http://mediaphoto.mnhn.fr/media/1441370025910XEhhYGuzDPPRKo8q
436965300	P00087543	10	1	0	0	2	0	P_Train	Apocynaceae	Craspidospermum	Craspidospermum verticillatum	http://mediaphoto.mnhn.fr/media/1441370563248316uKvgMhIugvl0k
436965303	P00554939	13	1	0	0	3	0	P_Train	Apocynaceae	Mascarenhasia	Mascarenhasia arborescens	http://mediaphoto.mnhn.fr/media/1441370448734sBbaJBfZClU5VeyN
436965306	P00554943	15	0	2	0	7	0	P_Train	Apocynaceae	Mascarenhasia	Mascarenhasia arborescens	http://mediaphoto.mnhn.fr/media/1441370162494uNlZNTYnxkdhQQk1
436965308	P00511655	29	8	0	0	9	0	P_Train	Apocynaceae	Mascarenhasia	Mascarenhasia arborescens	http://mediaphoto.mnhn.fr/media/1441370343170QbO6EFaMx1gKN3fz
436965309	P00511659	23	13	0	0	8	0	P_Train	Apocynaceae	Mascarenhasia	Mascarenhasia arborescens	http://mediaphoto.mnhn.fr/media/1441370343248DdY2ZvGRPqmykHvS
436965311	P00508710	6	2	0	0	4	0	P_Train	Apocynaceae	Mascarenhasia	Mascarenhasia arborescens	http://mediaphoto.mnhn.fr/media/1441370322977Ue2zV8NtNOy4vCfa
436965317	P00508739	6	0	1	0	6	0	P_Train	Apocynaceae	Mascarenhasia	Mascarenhasia arborescens	http://mediaphoto.mnhn.fr/media/1441370416850DlWsQt5Mq9BCrkHo
436965351	P00181429	1	0	0	0	2	0	P_Train	Arecaceae	Basselinia	Basselinia gracilis	http://mediaphoto.mnhn.fr/media/1441309388332a5rOH5hsdXK6kUrX
436965364	P00182094	3	0	0	0	4	0	P_Train	Arecaceae	Basselinia	Basselinia gracilis	http://mediaphoto.mnhn.fr/media/1441309390003cZwp5ynUREv4hfWG
436965420	P00095863	7	3	0	0	4	0	P_Train	Acanthaceae	Pseudocalyx	Pseudocalyx saccatus	http://mediaphoto.mnhn.fr/media/1441349823959P1yDnhOODddjV7ss
436965469	P00389172	63	17	0	0	20	0	P_Train	Sarcolaenaceae	Schizolaena	Schizolaena microphylla	http://mediaphoto.mnhn.fr/media/1442331541194UgbTgqocsRlIcIRh
436965496	P00183280	2	4	0	0	2	0	P_Train	Goodeniaceae	Scaevola	Scaevola sericea	http://mediaphoto.mnhn.fr/media/1441349213501QxTpsH9ARyyKbZez
436965517	P00087746	6	7	0	0	3	0	P_Train	Primulaceae	Ardisia	Ardisia atrobullata	http://mediaphoto.mnhn.fr/media/1442498959427EtmzsGS4QEj3KfRZ
436965522	P00087754	2	0	0	0	1	0	P_Train	Primulaceae	Ardisia	Ardisia devredii	http://mediaphoto.mnhn.fr/media/1442499242460y46neMlmoyNUxugx
436965541	P00172858	18	9	0	0	9	0	P_Train	Phyllanthaceae	Phyllanthus	Phyllanthus baladensis	http://mediaphoto.mnhn.fr/media/1441438881623FHuIwM0qj28ALC7V
436968688	P00480643	0	1	0	0	3	0	P_Test	Apocynaceae	Cynanchum	Cynanchum viminale	http://mediaphoto.mnhn.fr/media/1441370016084HgpBwwe5afkCAwNs
436968694	P00480661	0	2	0	0	6	0	P_Test	Apocynaceae	Cynanchum	Cynanchum viminale	http://mediaphoto.mnhn.fr/media/1441370029185KONGYrPba4Lo6OTk
436968695	P00480678	0	0	0	0	7	0	P_Test	Apocynaceae	Cynanchum	Cynanchum viminale	http://mediaphoto.mnhn.fr/media/1441370029505DSmHzwOii34vGMot
436968706	P00101489	13	1	2	0	6	0	P_Test	Asteraceae	Crassocephalum	Crassocephalum picridifolium	http://mediaphoto.mnhn.fr/media/1441343593015x0k4Pou9XOb5ETig
436968715	P00107407	19	7	0	0	16	3	P_Test	Orchidaceae	Liparis	Liparis ascendens	http://mediaphoto.mnhn.fr/media/1442481859688caKJcP1rJCxl4Hl7
436968738	P00122450	7	0	4	0	8	1	P_Test	Asteraceae	Senecio	Senecio hochstetteri	http://mediaphoto.mnhn.fr/media/1441343674405MEsxeeFHEaFS35F1
436968774	P00093525	20	0	3	0	10	0	P_Test	Rubiaceae	Pyrostria		http://mediaphoto.mnhn.fr/media/1442451961971mPunGIqVX1tFPOfc
436968775	P00088231	20	14	4	0	17	0	P_Test	Fabaceae	Dendrolobium	Dendrolobium triangulare	http://mediaphoto.mnhn.fr/media/1441330434760z6uvyJOSKHtVTGjt
436968779	P00088228	23	0	2	0	11	0	P_Test	Fabaceae	Dendrolobium	Dendrolobium triangulare	http://mediaphoto.mnhn.fr/media/1441330434698lrUY1p9ZojWVAXlN
436968784	P00093543	15	2	3	0	5	0	P_Test	Rubiaceae	Pyrostria		http://mediaphoto.mnhn.fr/media/1442451809083QeLMUO2aDTGzoUCM
436968798	P00108899	4	3	0	0	16	2	P_Test	Orchidaceae	Eulophia	Eulophia ibityensis	http://mediaphoto.mnhn.fr/media/1441306060795ZzLR6DUJKNECey5T
436968862	P00103159	4	0	0	0	3	0	P_Test	Acanthaceae	Asystasia	Asystasia vogeliana	http://mediaphoto.mnhn.fr/media/14413510372942kEvxI4uZDuT5PcZ
436968873	P00107421	27	5	0	0	28	0	P_Test	Lamiaceae	Lavandula	Lavandula antineae	http://mediaphoto.mnhn.fr/media/1441351461283ehi4xzj7c1rMx9La
436968885	P00120115	46	2	14	0	10	0	P_Test	Myrtaceae	Melaleuca	Melaleuca buseana	http://mediaphoto.mnhn.fr/media/1441399277435u4jdskqzHW9Wa3w3
436968886	P00120112	26	1	0	0	16	0	P_Test	Myrtaceae	Melaleuca	Melaleuca buseana	http://mediaphoto.mnhn.fr/media/14413992765659d6arV7pb6nlitBK
436968891	P00120222	7	4	0	0	4	0	P_Test	Myrtaceae	Melaleuca	Melaleuca pancheri	http://mediaphoto.mnhn.fr/media/1441395963450O1Z612ngkmPvEqTN
436968952	P00143920	7	1	0	0	5	1	P_Test	Orchidaceae	Pterostylis	Pterostylis bureaviana	http://mediaphoto.mnhn.fr/media/1441306932438yiUdGotj6pCmhIaU
436968967	P00143978	27	19	0	0	0	7	P_Test	Orchidaceae	Phreatia	Phreatia matthewsii	http://mediaphoto.mnhn.fr/media/1441306491722ghZHAnvKeD0JwkSC
436968973	P00124040	1	4	0	0	0	1	P_Test	Orchidaceae	Phreatia	Phreatia limenophylax	http://mediaphoto.mnhn.fr/media/14413066887930mfUBBhAJfvTnjNR
436968976	P00149693	55	0	10	0	21	0	P_Test	Fabaceae	Cynometra	Cynometra dauphinensis	http://mediaphoto.mnhn.fr/media/1441333311614oF8oSWfBS3cNJHjT
436968981	P00090425	2	1	0	0	0	1	P_Test	Orchidaceae	Aeranthes	Aeranthes caudata	http://mediaphoto.mnhn.fr/media/1441306374208HGByAgcoBWN7fvk8
436968984	P00090316	29	6	0	0	24	0	P_Test	Fabaceae	Cynometra	Cynometra madagascariensis	http://mediaphoto.mnhn.fr/media/1441333221502KQj3j47cK7XZpvtV
436968989	P00090491	6	2	1	0	0	2	P_Test	Orchidaceae	Aeranthes	Aeranthes tropophila	http://mediaphoto.mnhn.fr/media/144130637434027MXG6IMzsmakkag
436968991	P00093130	11	0	6	0	5	0	P_Test	Fabaceae	Phyllodium	Phyllodium longipes	http://mediaphoto.mnhn.fr/media/1441329999804EDg7nlRRkIaiVWfM
436968998	P00090540	2	0	0	0	0	1	P_Test	Orchidaceae	Jumellea	Jumellea brachycentra	http://mediaphoto.mnhn.fr/media/1442483248613QpOXmEozT9awHmAX
436968999	P00090538	5	0	0	0	0	3	P_Test	Orchidaceae	Jumellea	Jumellea brachycentra	http://mediaphoto.mnhn.fr/media/1442488264944E4V6pH3ju3oWRuUa
436969000	P00090537	2	1	0	0	0	1	P_Test	Orchidaceae	Jumellea	Jumellea brachycentra	http://mediaphoto.mnhn.fr/media/1442488262742begMmBARRTYTX7N0
436969005	P00131634	17	2	0	0	11	0	P_Test	Fabaceae	Bauhinia	Bauhinia capuronii	http://mediaphoto.mnhn.fr/media/1441333238672uRSjccP8fRVKGiF0
436969006	P00131632	13	3	0	0	7	0	P_Test	Fabaceae	Bauhinia	Bauhinia capuronii	http://mediaphoto.mnhn.fr/media/1441333238633NN9x3FvIjcwV3Tfv
436969020	P00090573	8	0	3	0	0	4	P_Test	Orchidaceae	Jumellea	Jumellea gregariiflora	http://mediaphoto.mnhn.fr/media/1442488286729AlrMR4b5xnZqbAK2
436969034	P00102608	45	0	0	0	26	7	P_Test	Balsaminaceae	Impatiens	Impatiens prasiniflora	http://mediaphoto.mnhn.fr/media/1442459085958tvvv0cY2Is91xwpv
436969042	P00311109	2	1	0	0	3	0	P_Test	Orchidaceae	Vanilla	Vanilla planifolia	http://mediaphoto.mnhn.fr/media/1441307164524YSmEKcTPpxv8jk89
436969076	P00121959	3	0	0	0	0	1	P_Test	Orchidaceae	Phreatia	Phreatia sublata	http://mediaphoto.mnhn.fr/media/1441306466073RODUvUiS13HenfDJ
436969091	P00310746	6	7	0	0	6	0	P_Test	Orchidaceae	Phaius	Phaius amboinensis	http://mediaphoto.mnhn.fr/media/1441307044116uqoURyKLXwQG9HLO
436969093	P00124050	7	3	0	0	13	0	P_Test	Orchidaceae	Phaius	Phaius daenikeri	http://mediaphoto.mnhn.fr/media/1441306974396CmGMvy9spxxhKmqN
436969102	P00149025	16	19	0	0	20	0	P_Test	Asteraceae	Senecio	Senecio maranguensis	http://mediaphoto.mnhn.fr/media/1441343192683vcaxClDkWbqEDtDL
436969107	P00124069	9	6	2	0	4	2	P_Test	Orchidaceae	Phaius	Phaius robertsii	http://mediaphoto.mnhn.fr/media/1441306974628zlbBiAxPUzHCsiEX
436969116	P00124098	3	0	9	0	8	0	P_Test	Orchidaceae	Phaius	Phaius tankervilleae	http://mediaphoto.mnhn.fr/media/144130697515622e01PyQIIh1lhfi
436969121	P00124118	8	5	0	0	3	0	P_Test	Orchidaceae	Phaius	Phaius tankervilleae	http://mediaphoto.mnhn.fr/media/1441306835637D95Uhms2bhu1UzTX
436969150	P00093012	14	20	0	0	14	0	P_Test	Fabaceae	Dendrolobium	Dendrolobium ursinum	http://mediaphoto.mnhn.fr/media/1441330335359eyoRi0nPIOWHKsI5
436969177	P00643367	10	10	1	0	14	0	P_Test	Bignoniaceae	Stereospermum	Stereospermum hildebrandtii	http://mediaphoto.mnhn.fr/media/1441350548421oi415cE74bcMhW9c
436969178	P00309667	15	4	0	0	1	0	P_Test	Bignoniaceae	Stereospermum	Stereospermum longiflorum	http://mediaphoto.mnhn.fr/media/14413505482421uutiiRmuKRy6yR9
436969225	P00257114	10	13	0	0	7	0	P_Test	Fabaceae	Julbernardia	Julbernardia pellegriniana	http://mediaphoto.mnhn.fr/media/1442342240261L6Lk6etCHe3TRwsh
436969238	P00478264	12	0	3	0	8	0	P_Test	Fabaceae	Tamarindus	Tamarindus indica	http://mediaphoto.mnhn.fr/media/14413495046988I8TJ9RLI845mUrb
