# Supplementary material for: Detection and annotation of plant organs from digitised herbarium scans using deep learning
Source: Biodivers Data J. 2020 Dec 10;8:e57090. doi: 10.3897/BDJ.8.e57090 (PMC7746675; doi:10.3897/BDJ.8.e57090)
Supplement: Supplementary material 3 — Family organ count [file bdj-08-e57090-s003.csv]

family	leaf	flower	fruit	seed	stem	root
Asteraceae	1865	1037	230	27	891	85
Malvaceae	2081	1110	38	2	774	18
Fabaceae	1758	418	167	7	642	3
Myrtaceae	1229	559	151	0	330	0
Orchidaceae	346	390	59	0	229	82
Rubiaceae	615	166	173	0	231	0
Apocynaceae	764	263	62	0	276	0
Solanaceae	533	161	64	0	203	1
Siparunaceae	175	77	26	0	97	0
Celastraceae	356	124	79	0	105	0
Potamogetonaceae	130	15	0	0	69	1
Sarcolaenaceae	190	23	55	0	101	0
Euphorbiaceae	223	50	17	11	58	11
Phyllanthaceae	169	65	6	0	73	0
Gentianaceae	239	102	0	0	161	22
Bromeliaceae	65	94	0	0	31	6
Lamiaceae	161	106	0	0	73	0
Combretaceae	112	41	34	1	35	0
Melastomataceae	81	63	0	0	36	0
Sphaerosepalaceae	76	30	20	0	48	0
Primulaceae	20	39	0	0	32	1
Lauraceae	66	79	4	0	22	0
Rhamnaceae	156	34	49	0	53	0
Convolvulaceae	45	25	0	0	20	0
Annonaceae	42	0	13	0	18	0
Acanthaceae	134	25	8	0	36	0
Cyperaceae	20	43	16	0	10	0
Ranunculaceae	49	9	5	0	25	0
Pentaphylacaceae	74	31	4	0	12	0
Violaceae	61	7	22	0	19	0
Arecaceae	9	0	19	0	8	0
Thymelaeaceae	31	33	1	1	9	0
Elaeocarpaceae	35	45	1	0	10	0
Zygophyllaceae	78	2	0	0	12	4
Cucurbitaceae	36	5	4	0	15	0
Vitaceae	33	18	0	0	17	0
Ebenaceae	41	10	14	0	19	0
Balsaminaceae	57	11	0	0	38	8
Crassulaceae	13	27	0	0	21	0
Moraceae	63	4	19	0	31	0
Theaceae	17	1	0	0	3	0
Boraginaceae	39	9	0	0	5	0
Cunoniaceae	41	0	63	0	13	0
Urticaceae	67	85	0	6	9	1
Lecythidaceae	7	1	8	0	9	0
Salicaceae	22	20	6	0	25	0
Anacardiaceae	6	9	7	0	8	0
Burseraceae	34	0	4	0	13	0
Hypericaceae	29	20	0	0	11	0
Calophyllaceae	18	14	0	0	8	0
Loganiaceae	37	0	3	2	15	0
Pentadiplandraceae	22	11	0	0	9	0
Monimiaceae	28	0	27	0	13	0
Erythroxylaceae	45	0	1	0	7	0
Malpighiaceae	28	23	0	0	18	0
Rutaceae	37	15	0	0	12	0
Didiereaceae	0	5	0	0	6	0
Ochnaceae	10	40	0	0	6	0
Passifloraceae	13	1	4	0	17	0
Bignoniaceae	25	14	1	0	15	0
Rosaceae	22	9	0	0	8	0
Orobanchaceae	16	22	0	0	11	4
Caryophyllaceae	17	14	0	0	14	0
Dichapetalaceae	13	0	1	0	8	0
Iridaceae	5	6	4	0	4	1
Nyctaginaceae	4	10	0	0	10	0
Liliaceae	5	1	0	0	3	0
Geraniaceae	12	2	10	0	5	0
Ericaceae	10	2	0	0	5	0
Aspleniaceae	126	0	0	0	7	2
Diegodendraceae	10	22	0	0	12	0
Clusiaceae	15	0	4	0	6	0
Capparaceae	7	1	0	0	8	0
Betulaceae	36	0	4	0	15	0
Linderniaceae	30	15	0	0	15	1
Atherospermataceae	11	11	0	0	5	0
Brassicaceae	13	3	0	0	9	0
Polygalaceae	3	22	0	0	3	0
Amaranthaceae	11	13	0	0	5	0
Apiaceae	30	7	0	0	14	1
Picrodendraceae	32	21	0	0	9	0
Pandanaceae	5	0	1	0	0	0
Olacaceae	61	0	18	0	18	0
Quiinaceae	4	11	0	0	3	0
Asparagaceae	5	27	0	0	3	3
Lythraceae	14	23	0	0	21	0
Oleaceae	11	8	0	0	5	0
Loranthaceae	13	0	0	0	7	0
Goodeniaceae	2	4	0	0	2	0
